# Supplementary material
Source: publisher figshare collection journal article supplement (https://gsajournals.figshare.com/ndownloader/files/25736786)
Supplement: Supplementary file 1 [file 25736786]

## Sheet: blastn.blobDB.table
contig name	length (bp)	GC content	N's in sequence	coverage	assigned phylum	sum of scores	c-index
ctg35418	18707	0.409	0	252371	Mollusca	516.0	0
ctg22904	32108	0.4007	0	34848	Mollusca	2393.0	0
ctg35413	19547	0.4231	0	232848	Mollusca	860.0	0
ctg35412	56466	0.4021	0	28353	Mollusca	1504.0	0
ctg35411	19145	0.4013	0	216676	Mollusca	1406.0	0
ctg35416	18919	0.4262	0	366882	Mollusca	910.0	0
ctg36691	18815	0.4499	0	255746	no-hit	0.0	0
ctg1199	220670	0.4249	0	323107	Mollusca	1793.0	2
contig_13560	210550	0.4072	0	432158	Chordata	1993.0	1
ctg22017	32980	0.414	0	659584	Platyhelminthes	1770.0	2
ctg22016	33170	0.4058	0	362218	Mollusca	705.0	0
ctg22015	37992	0.4109	0	181209	Chordata	3242.0	1
ctg22013	29953	0.4037	0	18454	Arthropoda	2894.0	1
ctg22011	33314	0.4122	0	255203	Mollusca	1458.0	0
ctg22018	33290	0.3981	0	252885	Mollusca	1273.0	1
ctg9291	129069	0.4063	0	28625	Mollusca	2358.0	2
ctg9290	74303	0.4103	0	326103	Mollusca	2382.0	0
ctg9294	77512	0.4274	0	338747	Mollusca	2505.0	0
ctg4669	122237	0.419	0	235788	Mollusca	1233.0	0
ctg4668	124359	0.4077	0	347881	Chordata	3272.0	1
ctg9299	78132	0.4132	0	272035	Mollusca	2068.0	0
ctg4665	242793	0.3998	0	414148	Mollusca	2787.0	3
ctg4663	183706	0.4123	0	371881	Mollusca	3586.0	1
ctg4660	124422	0.4081	0	239768	Mollusca	2844.0	0
tig02173184	254182	0.413	0	310391	Mollusca	2642.0	1
ctg33405	20152	0.435	0	428605	Mollusca	449.0	0
ctg36693	18218	0.4042	0	259635	Arthropoda	980.0	2
ctg8748	149256	0.4099	0	281368	Mollusca	2173.0	0
ctg8749	80590	0.423	0	217471	Chordata	13424.0	0
ctg8744	95714	0.4218	0	396015	Mollusca	3226.0	2
ctg58967	6889	0.4543	0	351186	no-hit	0.0	0
ctg8746	82753	0.3883	0	41354	Mollusca	2506.0	1
ctg8741	79611	0.3952	0	430496	Mollusca	2419.0	0
ctg58960	6778	0.4404	0	284716	no-hit	0.0	0
ctg45564	14692	0.3996	0	259055	Mollusca	279.0	0
ctg64188	16747	0.3988	0	17627	Mollusca	1995.0	0
ctg37122	18605	0.4177	0	184178	Mollusca	697.0	0
ctg37125	18070	0.3917	0	275595	Mollusca	1015.0	0
ctg37126	17935	0.4299	0	355652	Mollusca	832.0	0
ctg37128	17512	0.4048	0	319381	Mollusca	252.0	0
ctg41442	15538	0.4227	0	335921	Chordata	2950.0	0
ctg45561	21044	0.4303	0	188073	Mollusca	445.0	0
ctg45563	14124	0.4209	0	256516	no-hit	0.0	0
ctg25548	28241	0.4256	0	316957	Mollusca	1205.0	1
ctg25549	27568	0.4083	0	385306	Mollusca	1441.0	2
ctg43357	14610	0.4215	0	31754	Chordata	924.0	1
ctg43356	14607	0.3914	0	181824	Arthropoda	5259.0	1
ctg25540	28462	0.4067	0	207957	Chordata	2064.0	2
tig00004411	978213	0.4159	0	385679	Mollusca	6315.0	0
ctg25542	27016	0.3982	0	318442	Mollusca	185.0	0
ctg25543	28097	0.3959	0	202715	Mollusca	1593.0	0
ctg25544	28034	0.4081	0	305551	Mollusca	1162.0	1
ctg25545	39233	0.409	0	256788	Mollusca	958.0	0
ctg47845	9899	0.4578	0	226364	no-hit	0.0	0
ctg47846	12295	0.4131	0	228237	no-hit	0.0	0
ctg47841	23482	0.4282	0	129958	Platyhelminthes	1246.0	3
ctg7323	90740	0.4064	0	289381	Mollusca	2278.0	1
ctg47849	12247	0.4046	0	138985	no-hit	0.0	0
ctg47848	11832	0.3849	0	281182	no-hit	0.0	0
ctg38098	17651	0.4228	0	225406	Mollusca	549.0	0
ctg38099	35268	0.4186	0	302111	Chordata	1126.0	1
ctg38090	17601	0.3979	0	212605	Mollusca	640.0	0
ctg38091	17302	0.4166	0	219031	Mollusca	1393.0	0
ctg38092	17536	0.4096	0	146024	Mollusca	1001.0	0
ctg38095	17799	0.4147	0	280292	Mollusca	501.0	0
ctg38096	18036	0.4015	0	266297	Mollusca	1023.0	0
ctg30691	22925	0.3987	0	308613	no-hit	0.0	0
ctg30696	17820	0.2676	0	17618	no-hit	0.0	0
ctg30697	23575	0.4042	0	260469	Mollusca	942.0	0
ctg30698	42299	0.4135	0	197512	Mollusca	2163.0	1
ctg30699	50775	0.3963	0	394018	Mollusca	904.0	0
ctg38329	16639	0.4363	0	361534	Mollusca	488.0	0
ctg38325	17423	0.4153	0	195733	no-hit	0.0	0
ctg38322	17390	0.4213	0	266093	no-hit	0.0	0
ctg38321	24817	0.4387	0	275492	Mollusca	585.0	0
ctg7320	108337	0.4289	0	365846	Arthropoda	4593.0	3
ctg7927	89244	0.4214	0	23046	Mollusca	1905.0	0
ctg7926	88338	0.4084	0	385104	Chordata	3811.0	2
ctg40714	16290	0.3991	0	211082	no-hit	0.0	0
ctg40715	28735	0.371	0	406266	Mollusca	433.0	0
ctg7922	140649	0.42	0	47995	Mollusca	2920.0	2
ctg40718	16053	0.385	0	245805	Mollusca	326.0	0
contig_37023	1291391	0.4078	100	36761	Arthropoda	13777.0	1
ctg42407	15046	0.3958	0	138545	Mollusca	2390.0	0
ctg42405	15705	0.4201	0	22804	Mollusca	892.0	0
ctg48244	11488	0.4481	0	117213	Mollusca	448.0	0
contig_49668	203418	0.4117	0	26918	Mollusca	3040.0	1
ctg42409	15234	0.4017	0	259703	Mollusca	257.0	0
ctg63421	8279	0.4525	0	223032	no-hit	0.0	0
ctg18729	39918	0.412	0	490524	Mollusca	1453.0	4
contig_18270	585435	0.4149	0	375757	Mollusca	2874.0	1
tig00397201	278680	0.4162	0	319171	Mollusca	1746.0	1
ctg33929	19362	0.4084	0	365481	no-hit	0.0	0
ctg33925	8320	0.3626	0	1710546	no-hit	0.0	0
ctg33920	20977	0.3745	0	185837	Mollusca	1448.0	0
ctg33923	30860	0.4203	0	171402	Mollusca	3279.0	1
ctg47157	12204	0.4226	0	15569	Mollusca	241.0	0
ctg47154	12903	0.4364	0	354706	Mollusca	534.0	0
ctg47153	13067	0.3766	0	200975	no-hit	0.0	0
ctg47150	12780	0.4458	0	24286	no-hit	0.0	0
ctg14085	53914	0.4138	0	255388	Mollusca	866.0	0
ctg14080	52115	0.4109	0	398219	Mollusca	2408.0	0
ctg14083	84347	0.4282	0	362735	Mollusca	1769.0	0
ctg47158	13047	0.4109	0	23139	Mollusca	1123.0	0
tig00396557	253842	0.4142	0	426501	Mollusca	2733.0	2
ctg2153	418519	0.4093	0	331539	Mollusca	5166.0	0
tig00001690	488262	0.4355	0	44765	Mollusca	3328.0	1
tig00001694	240942	0.4171	0	210381	Chordata	4346.0	1
tig00019577	454713	0.4049	0	308366	Chordata	8885.0	1
ctg9296	79827	0.4189	0	36225	Mollusca	2963.0	1
ctg64235	10874	0.4019	0	142578	Mollusca	207.0	0
ctg55981	8406	0.43	0	298252	no-hit	0.0	0
ctg43430	12774	0.4234	0	143618	Chordata	4245.0	0
ctg46400	12515	0.4195	0	245744	no-hit	0.0	0
ctg43433	13804	0.4076	0	186472	no-hit	0.0	0
ctg46404	12856	0.385	0	351836	Mollusca	1077.0	0
contig_32501	260384	0.4271	0	327529	Mollusca	4333.0	0
ctg12902	53455	0.3985	0	272445	Mollusca	1303.0	0
ctg12906	58969	0.4184	0	426822	Mollusca	1116.0	1
ctg12904	82628	0.4049	0	218589	Mollusca	1877.0	0
ctg12908	129246	0.4005	0	247442	Arthropoda	3302.0	2
ctg15020	55150	0.4328	0	643371	no-hit	0.0	0
ctg15023	43996	0.4142	0	305926	Chordata	1126.0	1
ctg15028	42388	0.4172	0	633519	Mollusca	1100.0	2
ctg15029	134782	0.4453	0	662324	Mollusca	1650.0	1
contig_48278	294235	0.4168	0	282495	Mollusca	3396.0	1
tig00397540	736264	0.4054	0	360641	Chordata	2528.0	2
ctg5276	175985	0.4137	0	391063	Mollusca	3309.0	0
ctg5275	115225	0.4207	0	363629	Mollusca	3547.0	1
ctg5274	116561	0.4047	0	340365	Mollusca	1180.0	1
ctg5271	126580	0.4047	0	360561	Mollusca	1710.0	0
ctg5270	222594	0.411	0	229227	Mollusca	3516.0	3
contig_20899	300934	0.4159	0	321081	Mollusca	4749.0	0
ctg54254	9137	0.4368	0	372748	Mollusca	1049.0	0
ctg42381	22749	0.403	0	244549	Mollusca	2115.0	0
ctg42380	15168	0.3966	0	225617	Mollusca	244.0	0
ctg42383	39496	0.4051	0	326316	no-hit	0.0	0
ctg42382	15384	0.4026	0	343346	Mollusca	505.0	0
ctg42385	14771	0.4183	0	252633	Chordata	1953.0	2
ctg42384	15464	0.4152	0	201093	Mollusca	718.0	0
ctg42387	14316	0.4093	0	251932	Mollusca	417.0	0
ctg45178	11572	0.4405	0	238383	Mollusca	385.0	0
tig00395472	643697	0.4126	0	407592	Mollusca	2951.0	2
contig_31071	264318	0.4129	0	302322	Mollusca	3262.0	0
ctg48521	27572	0.4294	0	228484	Mollusca	1189.0	1
ctg48520	12294	0.4248	0	259844	no-hit	0.0	0
ctg48527	11695	0.4325	0	245417	Mollusca	4706.0	0
ctg52944	8356	0.4613	0	270478	no-hit	0.0	0
ctg48524	11886	0.3913	0	14909	Mollusca	481.0	0
ctg48528	83382	0.4195	0	316755	Mollusca	2648.0	3
contig_25810	250920	0.4086	0	370877	Mollusca	3052.0	1
ctg8745	160838	0.4257	0	337464	Mollusca	1886.0	1
ctg12275	60553	0.3971	0	222326	Mollusca	1614.0	1
ctg12277	104592	0.4184	0	358204	Mollusca	3635.0	0
ctg12270	95595	0.4263	0	350779	Mollusca	1870.0	0
ctg12271	61180	0.4269	0	469546	Mollusca	1260.0	1
ctg12272	125479	0.4183	0	330333	Mollusca	3910.0	1
ctg12273	61269	0.4057	0	315652	Mollusca	3729.0	0
tig00009003	354963	0.4132	0	282537	Chordata	2417.0	3
ctg8742	118263	0.4115	0	242202	Mollusca	2323.0	3
ctg28518	23981	0.4209	0	273308	Chordata	860.0	1
ctg16598	45129	0.4064	0	218623	Arthropoda	1020.0	2
ctg16595	45281	0.4292	0	26754	Mollusca	1657.0	0
ctg16594	44758	0.3967	0	340909	Mollusca	2376.0	0
ctg28516	46242	0.4359	0	249624	Chordata	2974.0	1
ctg16596	45955	0.4252	0	250276	Mollusca	1426.0	1
ctg28510	23459	0.409	0	232201	Mollusca	2447.0	0
ctg28511	25152	0.4057	0	224735	Mollusca	1540.0	0
ctg28512	25308	0.3992	0	495966	Mollusca	244.0	0
ctg7312	93102	0.4058	0	214806	Chordata	4198.0	2
ctg7313	148101	0.4191	0	344676	Mollusca	5516.0	0
ctg19613	36586	0.4265	0	263573	Arthropoda	910.0	2
ctg19612	37644	0.4024	0	345611	Mollusca	653.0	0
ctg19611	49774	0.4344	0	299469	Mollusca	972.0	0
tig00395942	338607	0.4133	0	621007	Mollusca	3659.0	0
ctg19617	95761	0.4143	0	369609	Mollusca	2251.0	0
contig_16291	215563	0.4065	0	428962	Mollusca	2741.0	1
ctg19614	54427	0.4071	0	371025	Mollusca	566.0	0
ctg19619	38462	0.4145	0	310717	Mollusca	1334.0	1
ctg19618	37578	0.4099	0	762796	Mollusca	2679.0	1
ctg20749	94819	0.4155	0	431953	Mollusca	1083.0	1
ctg20748	66320	0.4163	0	242456	Mollusca	3268.0	0
tig00015381	783043	0.4063	100	406997	Arthropoda	15477.0	1
ctg20741	112464	0.4176	0	272101	Mollusca	1756.0	1
ctg41121	15609	0.3914	0	149657	Chordata	4567.0	1
ctg20743	34669	0.4092	0	201325	Mollusca	968.0	0
ctg20745	35342	0.4076	0	281354	Mollusca	2717.0	0
ctg20746	35167	0.4107	0	322187	Mollusca	615.0	0
ctg27779	25731	0.4452	0	195622	Mollusca	176.0	0
ctg27778	23510	0.4298	0	44.58	no-hit	0.0	0
ctg27771	25527	0.4394	0	253375	Mollusca	760.0	0
ctg27770	25642	0.4167	0	199261	Mollusca	1981.0	0
ctg27773	24712	0.4402	0	29599	Mollusca	467.0	0
ctg27775	25606	0.4285	0	334059	Mollusca	1191.0	0
ctg19285	38397	0.421	0	1057071	Mollusca	2780.0	0
ctg51375	10639	0.4363	0	189641	Mollusca	281.0	0
ctg51377	10798	0.3994	0	207242	Mollusca	669.0	0
tig00403279	371991	0.4169	0	320062	Mollusca	3252.0	1
ctg51371	14498	0.3963	0	26673	Mollusca	418.0	0
ctg51372	10826	0.3872	0	1043013	no-hit	0.0	0
ctg30173	37679	0.4095	0	212094	Mollusca	710.0	0
ctg19281	38075	0.4199	0	359089	Mollusca	2399.0	0
tig02170431	955332	0.4086	0	396749	Mollusca	3670.0	2
tig00400566	402801	0.4028	0	248901	Arthropoda	5031.0	2
tig00407690	356737	0.4091	0	293244	Mollusca	3013.0	1
contig_14639	342501	0.4098	0	349153	Mollusca	4170.0	0
ctg29741	54859	0.4191	0	284946	Mollusca	3951.0	0
ctg29748	23848	0.4144	0	392189	Mollusca	1507.0	0
ctg29749	23759	0.4195	0	312309	Mollusca	1331.0	1
ctg41447	15520	0.4026	0	270448	Mollusca	766.0	1
ctg51998	10761	0.3702	0	710004	Mollusca	167.0	0
ctg51993	9900	0.4287	0	308852	no-hit	0.0	0
ctg51994	10586	0.3966	0	248498	Mollusca	219.0	0
ctg51995	10324	0.3887	0	255525	no-hit	0.0	0
ctg51996	10638	0.4197	0	199589	Mollusca	1859.0	0
ctg51997	10009	0.4023	0	141669	Mollusca	881.0	0
ctg57234	7670	0.3802	0	183514	no-hit	0.0	0
ctg57233	7684	0.4209	0	218615	Mollusca	653.0	0
ctg57232	6362	0.4302	0	161606	no-hit	0.0	0
tig00400658	430744	0.4179	0	285273	Mollusca	10277.0	0
tig00402631	309370	0.4107	0	264654	Mollusca	3372.0	1
ctg32520	21418	0.4186	0	235015	Mollusca	512.0	0
ctg32526	19486	0.4207	0	251292	Chordata	3359.0	1
ctg32529	31302	0.4247	0	345142	Mollusca	826.0	0
contig_16901	555401	0.4227	0	317296	Chordata	6146.0	1
tig00065117	372255	0.4118	0	380381	Mollusca	2296.0	2
tig00396995	801080	0.4123	0	380136	Mollusca	3450.0	2
ctg43354	14494	0.3675	0	21876	no-hit	0.0	0
tig02174439	230901	0.3574	0	647984	Mollusca	2172.0	1
ctg63322	5142	0.4741	0	201685	Mollusca	916.0	0
ctg15920	47412	0.4427	0	271175	Mollusca	1332.0	1
ctg15923	45678	0.4069	0	238276	Nematoda	937.0	3
ctg15926	89719	0.3956	0	234398	Mollusca	1166.0	0
scaffold_51022	683576	0.4261	0	36549	Mollusca	3769.0	3
contig_12100	297206	0.4251	0	375842	Mollusca	3551.0	0
contig_12108	217865	0.4128	0	24556	Mollusca	2182.0	2
ctg43358	14668	0.4241	0	197602	Chordata	1871.0	1
contig_6750	233336	0.4243	0	490707	Mollusca	3305.0	1
ctg57907	7295	0.4408	0	190704	Mollusca	1165.0	0
ctg57908	7266	0.4565	0	229348	Mollusca	9659.0	0
tig00026233	282094	0.417	0	337034	Mollusca	6507.0	1
ctg22659	32187	0.4185	0	360291	Mollusca	1669.0	0
ctg22658	32303	0.4083	0	187513	Mollusca	1850.0	2
ctg203	781417	0.4045	0	362615	Mollusca	4460.0	1
ctg22651	32227	0.4159	0	379096	Mollusca	588.0	0
ctg46362	14403	0.405	0	346897	Mollusca	943.0	0
contig_28553	1558221	0.4043	0	371225	Chordata	4077.0	2
ctg22655	33053	0.4165	0	252537	Mollusca	1111.0	0
ctg209	387751	0.4068	0	377996	Mollusca	3523.0	1
ctg22657	40691	0.4049	0	296658	Chordata	3326.0	1
ctg39435	16913	0.4192	0	224685	Mollusca	1709.0	1
ctg39437	16444	0.4154	0	149749	Mollusca	432.0	0
ctg25389	23138	0.5131	0	391298	no-hit	0.0	0
ctg39430	12853	0.3766	0	51607	no-hit	0.0	0
ctg39432	16326	0.4158	0	252266	Mollusca	7627.0	0
ctg25380	34563	0.4487	0	275771	Mollusca	775.0	0
ctg25381	77952	0.3946	0	1061563	Mollusca	3603.0	0
ctg49357	11567	0.4338	0	404551	no-hit	0.0	0
ctg13437	73871	0.4207	0	320799	Mollusca	1126.0	0
ctg25384	28281	0.4061	0	274052	Mollusca	1023.0	0
ctg25385	28961	0.4084	0	31478	Mollusca	1188.0	2
tig00011099	903735	0.4156	0	310002	Mollusca	15176.0	0
tig00049394	252862	0.388	0	311464	Mollusca	3887.0	1
ctg63943	5034	0.4664	0	130346	no-hit	0.0	0
ctg61359	6314	0.4035	0	137856	no-hit	0.0	0
ctg63940	3189	0.4653	0	296273	no-hit	0.0	0
ctg35899	19864	0.4203	0	181418	Mollusca	982.0	1
ctg35894	19211	0.4104	0	507687	Mollusca	447.0	0
ctg37002	18124	0.4256	0	407768	Chordata	2047.0	2
ctg37003	18513	0.441	0	226564	Mollusca	475.0	0
ctg37000	19153	0.387	0	255583	no-hit	0.0	0
ctg37009	17943	0.4051	0	363703	Mollusca	1961.0	1
contig_3706	315949	0.4099	0	190505	Mollusca	3807.0	1
contig_19714	780970	0.4144	0	377824	Chordata	6004.0	2
tig02169662	513623	0.4115	0	326793	Mollusca	2902.0	3
ctg6897	109104	0.4251	0	393317	Mollusca	3585.0	1
ctg6894	108883	0.416	0	366088	Chordata	4176.0	1
ctg6895	93394	0.4157	0	281396	Mollusca	1192.0	0
ctg6899	267091	0.4059	0	377948	Mollusca	3853.0	1
ctg8942	276687	0.4188	0	37.61	Mollusca	2246.0	2
ctg8943	81412	0.41	0	290518	Mollusca	2415.0	2
ctg8940	79605	0.4061	0	340718	Mollusca	1742.0	1
ctg8946	143630	0.4215	0	200586	Mollusca	2578.0	2
ctg8945	140036	0.4253	0	182104	Mollusca	6309.0	0
ctg63290	5179	0.4227	0	32493	Mollusca	908.0	0
ctg24161	28559	0.4305	0	242365	Chordata	1204.0	1
ctg24166	30250	0.4034	0	339782	Arthropoda	1038.0	1
contig_4283	609236	0.4167	0	384782	Mollusca	3887.0	2
contig_8502	659955	0.413	0	410393	Arthropoda	11902.0	1
tig02169085	314262	0.4021	0	396952	Mollusca	2582.0	1
tig00046570	240281	0.4066	0	35708	Arthropoda	4896.0	2
tig02186628	231646	0.4085	0	174318	Mollusca	3217.0	1
ctg21593	53951	0.4026	0	300994	Mollusca	1792.0	1
ctg6747	95936	0.4288	0	368252	Mollusca	921.0	2
ctg6743	175337	0.3939	0	368493	Mollusca	3237.0	1
ctg7413	93288	0.431	0	333536	Mollusca	2860.0	2
ctg7415	82949	0.4017	0	349387	Mollusca	2780.0	0
ctg6740	378241	0.4127	0	305773	Mollusca	5932.0	0
ctg7417	92127	0.4089	0	354407	Mollusca	1973.0	1
ctg7416	84004	0.4292	0	390413	Mollusca	178.0	0
ctg7419	87528	0.3933	0	427732	Mollusca	1987.0	0
ctg7418	101434	0.4048	0	246917	Mollusca	1465.0	0
ctg29525	24115	0.4312	0	18072	Mollusca	673.0	3
ctg6749	100233	0.4058	0	322702	Mollusca	2157.0	0
tig02172890	426248	0.4139	0	415325	Mollusca	3068.0	2
ctg56626	7930	0.4079	0	155357	no-hit	0.0	0
ctg56628	7615	0.4386	0	22255	Mollusca	424.0	0
ctg64441	35792	0.4384	0	470164	no-hit	0.0	0
ctg2541	206251	0.4136	0	363146	Mollusca	4095.0	0
ctg29528	23509	0.404	0	223226	Mollusca	577.0	0
ctg2548	166193	0.4227	0	23785	Mollusca	3087.0	1
ctg35339	19686	0.4313	0	181018	Mollusca	1370.0	0
ctg35333	20641	0.4192	0	250638	Mollusca	1411.0	0
ctg35331	19601	0.4006	0	800767	Mollusca	643.0	0
ctg35337	19153	0.4396	0	318119	Mollusca	574.0	0
contig_14175	417152	0.4149	0	416581	Mollusca	3949.0	2
ctg23243	30771	0.4101	0	274167	Mollusca	1552.0	0
ctg23244	27238	0.3883	0	322019	no-hit	0.0	0
ctg23247	31044	0.4101	0	342211	Mollusca	1293.0	0
ctg23249	31574	0.385	0	142598	Chordata	1609.0	2
ctg23248	30197	0.4363	0	344221	Mollusca	492.0	0
contig_41595	327216	0.4182	0	254117	Mollusca	10361.0	0
ctg57571	24164	0.4173	0	309291	Mollusca	325.0	0
ctg57575	7161	0.3903	0	217128	Chordata	6311.0	1
tig00047747	520343	0.4179	0	388334	Mollusca	2905.0	1
ctg5709	209003	0.4245	0	350968	Arthropoda	4140.0	1
ctg5706	127688	0.4225	0	352829	Mollusca	2476.0	0
ctg5700	126591	0.4039	0	325057	Mollusca	2069.0	0
ctg36159	15864	0.4412	0	269367	no-hit	0.0	0
ctg36157	36909	0.4313	0	210069	Mollusca	959.0	0
ctg1012	229276	0.4112	0	294022	Mollusca	3596.0	1
ctg36154	17605	0.4807	0	529575	no-hit	0.0	0
ctg32648	20886	0.4007	0	249052	Mollusca	943.0	0
ctg58739	7179	0.4405	0	208293	no-hit	0.0	0
ctg32642	21384	0.4241	0	194546	Mollusca	523.0	0
ctg32641	22661	0.4037	0	234271	Mollusca	1615.0	0
ctg4251	316532	0.4001	0	276237	Mollusca	3533.0	2
ctg32647	21341	0.3934	0	119082	Mollusca	569.0	0
ctg32646	21452	0.3828	0	33348	Chordata	956.0	1
ctg3708	158675	0.4174	0	212961	Mollusca	3029.0	1
ctg8539	84303	0.4213	0	351611	Mollusca	1892.0	1
ctg38428	17488	0.4184	0	269282	Mollusca	172.0	1
ctg3701	137217	0.4333	0	365574	Mollusca	2636.0	0
ctg3700	139634	0.445	0	458707	Arthropoda	1455.0	1
ctg8531	129756	0.4047	0	321692	Mollusca	1613.0	0
ctg3702	220548	0.4127	0	419294	Mollusca	3317.0	1
ctg8537	80617	0.4144	0	28851	Mollusca	1989.0	0
ctg3704	140443	0.4152	0	27452	Mollusca	2219.0	1
ctg8535	83213	0.4043	0	386257	Mollusca	3366.0	0
ctg38422	17741	0.4279	0	285318	Arthropoda	4251.0	1
ctg48240	11914	0.4063	0	132.03	Mollusca	178.0	0
ctg33065	21140	0.434	0	208756	Chordata	924.0	1
ctg33066	21039	0.3965	0	200706	Mollusca	1266.0	0
ctg33062	20709	0.4226	0	227614	Mollusca	2238.0	0
tig00065518	218465	0.4204	0	283584	Mollusca	3215.0	2
ctg9733	132959	0.4073	0	564781	Mollusca	2677.0	2
ctg6426	164814	0.4205	0	350791	Mollusca	3436.0	1
ctg9737	73679	0.4221	0	272724	Chordata	2295.0	1
ctg43250	13682	0.3912	0	191615	no-hit	0.0	0
ctg43251	14669	0.4221	0	25226	Chordata	689.0	1
ctg43252	27723	0.4483	0	411596	no-hit	0.0	0
ctg43253	21392	0.4316	0	58.94	Mollusca	924.0	0
ctg43255	14713	0.427	0	234718	Mollusca	1493.0	0
ctg39778	16745	0.3959	0	328946	Mollusca	624.0	0
ctg43259	35803	0.394	0	189288	Mollusca	630.0	0
ctg39773	16140	0.3312	0	0.2766	no-hit	0.0	0
ctg39770	15978	0.3984	0	157282	Mollusca	1178.0	0
ctg9739	94154	0.4164	0	295497	Mollusca	844.0	0
ctg33688	20505	0.4028	0	234958	Mollusca	605.0	0
ctg33689	20424	0.4253	0	232247	Mollusca	2665.0	0
ctg40505	15580	0.4169	0	83658	Mollusca	148.0	0
ctg40506	15908	0.388	0	377586	Arthropoda	2064.0	0
ctg33680	20472	0.4363	0	190275	Chordata	3385.0	0
ctg33681	20658	0.4042	0	976807	Mollusca	680.0	0
ctg33686	20719	0.4197	0	233465	Mollusca	831.0	0
ctg17957	42290	0.4065	0	279918	Mollusca	1302.0	0
ctg17954	41491	0.4289	0	326369	Mollusca	875.0	0
ctg17952	58156	0.416	0	306785	Platyhelminthes	1368.0	3
tig00061516	328044	0.42	0	340479	Chordata	9813.0	0
ctg15749	46460	0.4064	0	398107	Cnidaria	2005.0	2
ctg56420	5333	0.5078	0	769756	no-hit	0.0	0
tig00002067	381702	0.4121	0	366024	Mollusca	2644.0	1
ctg55666	8646	0.4153	0	315098	Mollusca	250.0	0
ctg15743	47821	0.4211	0	408899	Mollusca	1653.0	0
ctg64172	7582	0.3743	0	166412	no-hit	0.0	0
ctg30082	21908	0.4352	0	396492	Mollusca	1173.0	0
ctg30080	23820	0.4154	0	18833	Chordata	1717.0	1
ctg64176	10909	0.4269	0	530973	no-hit	0.0	0
ctg30086	23946	0.4252	0	530886	Mollusca	582.0	0
ctg30089	55721	0.3934	0	19.8	Mollusca	1743.0	1
ctg64179	14493	0.4256	0	390634	Mollusca	817.0	1
contig_8258	373839	0.4185	0	380759	Chordata	3268.0	2
ctg56422	8208	0.4066	0	230037	no-hit	0.0	0
ctg1833	216731	0.3951	0	297338	Mollusca	4172.0	0
ctg1832	290944	0.4169	0	347979	Chordata	5021.0	1
ctg1839	206185	0.4159	0	316082	Mollusca	2668.0	1
ctg42612	14607	0.4226	0	286843	Mollusca	457.0	0
ctg42610	14884	0.4038	0	184438	Mollusca	1383.0	0
ctg52339	10219	0.4352	0	228885	Mollusca	1121.0	1
ctg31689	22574	0.4123	0	180533	Chordata	973.0	2
ctg31686	31317	0.4142	0	241355	Mollusca	727.0	0
ctg31684	21937	0.4098	0	227081	Mollusca	1180.0	0
ctg31682	22107	0.4368	0	158165	Mollusca	161.0	0
ctg31683	21971	0.431	0	313006	Arthropoda	2711.0	1
ctg31680	22797	0.4348	0	208203	no-hit	0.0	0
ctg31681	22661	0.4207	0	259616	Chordata	342.0	2
scaffold_43483	210434	0.4218	90	466528	Chordata	4592.0	3
tig00039695	317134	0.4156	0	246371	Mollusca	5635.0	0
ctg62437	5082	0.4148	0	336988	Mollusca	983.0	0
ctg31357	23052	0.3944	0	384884	Mollusca	2166.0	0
ctg31358	22658	0.4107	0	227276	Mollusca	636.0	0
ctg31359	22360	0.4088	0	259451	Mollusca	237.0	0
ctg14544	51499	0.4137	0	418295	Mollusca	1359.0	0
ctg14547	71717	0.4109	0	356098	Mollusca	2582.0	0
ctg14540	66425	0.3919	0	32997	Mollusca	3483.0	1
ctg14541	51303	0.4098	0	354493	Mollusca	918.0	1
ctg14543	115078	0.4115	0	273433	Mollusca	2201.0	1
ctg14548	53141	0.4187	0	367376	Mollusca	1257.0	0
tig00092050	598562	0.4108	0	37166	Chordata	6439.0	2
ctg15498	48729	0.392	0	217128	Mollusca	2046.0	1
ctg28890	47077	0.4182	0	306069	Mollusca	1228.0	0
ctg28893	24760	0.4106	0	215553	Mollusca	1320.0	0
ctg15491	48701	0.4125	0	318776	Mollusca	1935.0	0
ctg15490	49135	0.4024	0	200.49	Mollusca	967.0	0
ctg15492	48034	0.4236	0	25.36	Chordata	1306.0	1
ctg15495	49004	0.4163	0	251161	Mollusca	1515.0	1
ctg15494	68352	0.4047	0	30175	Mollusca	1938.0	0
ctg15497	49372	0.3992	0	326167	Mollusca	1352.0	0
ctg15496	49271	0.4194	0	625768	Platyhelminthes	1988.0	3
ctg45044	13377	0.4008	0	112896	no-hit	0.0	0
ctg53061	9720	0.4855	0	262678	Mollusca	154.0	0
tig00404874	594238	0.3995	0	384788	Chordata	6241.0	2
ctg53068	8951	0.4374	0	144784	Chordata	2010.0	2
tig00104706	227850	0.3965	23	339289	Mollusca	8050.0	0
ctg54594	9066	0.425	0	37698	Mollusca	969.0	0
tig00121787	424007	0.4007	0	336291	Mollusca	2536.0	1
ctg54591	9051	0.4195	0	328781	Mollusca	156.0	0
ctg54590	8749	0.3967	0	227037	no-hit	0.0	0
ctg51514	11098	0.4086	0	198824	Mollusca	420.0	0
ctg49594	9536	0.4721	0	48993	no-hit	0.0	0
ctg25172	27389	0.4099	0	222079	Mollusca	787.0	0
ctg49591	11316	0.3773	0	236281	Mollusca	501.0	0
ctg49590	25648	0.3876	0	443388	Chordata	791.0	1
ctg19133	87475	0.3985	0	451991	Chordata	879.0	1
ctg19130	37554	0.4285	0	21696	Mollusca	6157.0	0
ctg19131	49704	0.4226	0	30.95	Mollusca	1032.0	0
ctg19136	39035	0.4136	0	176901	Mollusca	1205.0	1
ctg19134	50784	0.4143	0	476893	Chordata	2224.0	1
contig_28864	312593	0.4058	0	303955	Mollusca	3055.0	1
ctg11448	64946	0.4232	0	465572	Mollusca	1156.0	0
ctg11449	93721	0.418	0	195812	Mollusca	2993.0	2
ctg11446	97804	0.405	0	390154	Arthropoda	2188.0	1
ctg11444	66620	0.4123	0	250231	Mollusca	1642.0	0
ctg11445	65482	0.4144	0	21602	Chordata	9049.0	0
ctg11442	65828	0.4167	0	366844	Mollusca	2599.0	0
ctg11440	66842	0.3705	0	287353	Mollusca	2670.0	0
ctg46613	12793	0.4221	0	176087	Mollusca	167.0	0
ctg61828	5999	0.3892	0	73663	no-hit	0.0	0
contig_16540	228155	0.4121	0	254779	Mollusca	3211.0	0
ctg44613	13473	0.4744	0	186967	no-hit	0.0	0
ctg44612	13949	0.4093	0	731522	no-hit	0.0	0
ctg44615	14166	0.4128	0	375283	Mollusca	483.0	0
ctg59749	6819	0.4122	0	229545	no-hit	0.0	0
tig00396519	695719	0.4122	0	404463	Chordata	10401.0	0
ctg59743	6564	0.4372	0	192221	no-hit	0.0	0
ctg59747	24176	0.4341	0	168816	no-hit	0.0	0
ctg19798	69090	0.4113	0	494028	Mollusca	1975.0	0
ctg19799	36820	0.4048	0	156064	Mollusca	1027.0	0
ctg19797	34561	0.4332	0	398871	Mollusca	1581.0	0
ctg19792	37411	0.423	0	434108	Mollusca	935.0	0
ctg19793	37719	0.4382	0	371156	Mollusca	507.0	0
ctg19790	64698	0.4047	0	238761	Chordata	1576.0	2
ctg16142	87026	0.4153	0	256611	Mollusca	3340.0	0
ctg16143	46724	0.4122	0	269563	Mollusca	1022.0	0
ctg16141	83497	0.4108	0	620075	Mollusca	1477.0	1
contig_10875	208631	0.3979	0	308525	Mollusca	2350.0	1
ctg61310	5970	0.3884	0	153525	no-hit	0.0	0
ctg16144	46302	0.4346	0	380924	Mollusca	3153.0	0
ctg7083	117308	0.4398	0	419171	Chordata	2289.0	2
ctg16148	164517	0.4118	0	362114	Mollusca	6671.0	1
tig00066227	229929	0.3922	0	398537	Mollusca	3362.0	1
ctg54044	8851	0.407	0	175502	no-hit	0.0	0
ctg54047	8952	0.4161	0	217733	no-hit	0.0	0
ctg54041	9179	0.4198	0	313498	Chordata	1126.0	1
ctg54040	9263	0.4776	0	290737	no-hit	0.0	0
ctg19865	135792	0.4034	0	298068	Mollusca	3103.0	0
ctg19866	36221	0.4123	0	276704	Mollusca	742.0	0
ctg19867	37587	0.3948	0	366245	Mollusca	559.0	0
tig00400022	357655	0.4214	0	300804	Mollusca	3333.0	1
ctg19863	38670	0.4101	0	321474	Mollusca	558.0	0
ctg6700	171417	0.4321	0	310067	Mollusca	3458.0	0
ctg6701	181539	0.4123	0	19259	Mollusca	2789.0	1
ctg19868	37204	0.4044	0	310385	Mollusca	1514.0	0
ctg19869	57947	0.4071	0	365895	Mollusca	1754.0	1
ctg6704	172246	0.4204	0	346047	Mollusca	3423.0	1
ctg24362	28688	0.4245	0	54401	Mollusca	222.0	0
ctg24361	29611	0.4193	0	299429	Mollusca	734.0	0
ctg24367	29495	0.4155	0	400287	Mollusca	2164.0	0
ctg24364	29775	0.4058	0	251256	Mollusca	1582.0	0
ctg54273	8150	0.4448	0	312915	no-hit	0.0	0
ctg50745	10786	0.4014	0	316175	no-hit	0.0	0
ctg50742	10975	0.443	0	167973	Mollusca	527.0	0
ctg50748	13351	0.4195	0	257549	Mollusca	1099.0	1
ctg21628	33705	0.4195	0	362296	Chordata	956.0	1
ctg21621	34116	0.3942	0	265297	Mollusca	1371.0	0
ctg21622	33250	0.4149	0	238511	Mollusca	967.0	0
ctg21625	33857	0.4099	0	304681	Mollusca	2062.0	0
ctg21627	33978	0.3992	0	131808	Mollusca	560.0	0
ctg21626	68466	0.4107	0	271084	Chordata	1366.0	2
tig00401551	227771	0.4064	0	328535	Arthropoda	3354.0	2
contig_9683	244480	0.4079	0	313604	Mollusca	4231.0	0
contig_10253	226814	0.4197	0	380263	Mollusca	2100.0	4
ctg28705	24516	0.4178	0	478912	Mollusca	638.0	1
ctg28701	24848	0.3842	0	592812	no-hit	0.0	0
ctg28702	24842	0.4033	0	218854	Mollusca	259.0	0
ctg28144	23791	0.4406	0	381121	Mollusca	297.0	0
tig02186351	1279587	0.4135	0	476422	Mollusca	3366.0	1
ctg17233	48519	0.4281	0	321015	Mollusca	937.0	0
ctg17232	66680	0.4332	0	253822	Mollusca	1048.0	0
ctg17231	82674	0.426	0	303972	Mollusca	1826.0	2
ctg17236	32631	0.3495	0	90055	no-hit	0.0	0
ctg17237	73580	0.3995	0	250484	Mollusca	2597.0	0
ctg17235	44196	0.4338	0	33538	Mollusca	1062.0	0
ctg20280	36639	0.4206	0	209952	Mollusca	646.0	0
ctg20284	40178	0.412	0	385288	Mollusca	2499.0	1
ctg20285	36458	0.4406	0	28474	Mollusca	906.0	0
ctg20286	35163	0.4116	0	371223	Mollusca	858.0	0
ctg20288	36026	0.4016	0	217778	Mollusca	1405.0	0
tig00398962	372216	0.4184	0	350936	Mollusca	3930.0	1
ctg61860	6008	0.4184	0	326902	no-hit	0.0	0
tig00032316	468475	0.4244	0	312783	Mollusca	4364.0	0
contig_15759	228020	0.4064	0	296888	Arthropoda	15326.0	1
ctg53807	9130	0.3701	0	310454	no-hit	0.0	0
ctg60194	6153	0.4611	0	252698	no-hit	0.0	0
ctg53809	9147	0.4279	0	259614	no-hit	0.0	0
contig_15754	440990	0.406	0	373987	Mollusca	3899.0	1
tig02186979	276463	0.421	0	232482	Mollusca	3493.0	1
ctg27108	25528	0.4474	0	13831	Chordata	150.0	1
ctg27109	25210	0.4293	0	495533	Mollusca	792.0	0
ctg27102	18932	0.3697	0	271534	no-hit	0.0	0
ctg27107	25451	0.4374	0	266759	Mollusca	429.0	0
ctg27105	26283	0.423	0	272127	Mollusca	361.0	0
ctg35138	20139	0.4247	0	27048	Mollusca	2890.0	0
ctg35136	30623	0.4049	0	292303	Mollusca	1037.0	0
ctg56353	8160	0.4205	0	210968	Mollusca	473.0	0
ctg35132	19746	0.4217	0	162609	Mollusca	398.0	0
ctg35133	19273	0.3948	0	29761	Mollusca	864.0	0
tig02187002	312212	0.4117	0	316073	Arthropoda	4974.0	2
ctg26859	26704	0.4045	0	156234	Mollusca	1600.0	0
ctg26858	25689	0.4379	0	185517	no-hit	0.0	0
ctg26856	36764	0.4114	0	232955	Mollusca	1190.0	0
ctg26853	26670	0.4025	0	210214	Mollusca	1004.0	1
ctg26851	26765	0.4451	0	257999	Mollusca	412.0	0
ctg26850	44455	0.4047	0	402072	Mollusca	3073.0	0
ctg906	232403	0.409	0	279048	Mollusca	4028.0	1
ctg48081	12205	0.4518	0	103988	Mollusca	2008.0	0
ctg60734	6146	0.4486	0	210862	Chordata	1260.0	1
ctg35680	19188	0.3957	0	331109	Mollusca	198.0	0
tig00013279	629224	0.4145	0	355252	Arthropoda	3403.0	1
ctg10278	68455	0.3922	0	195727	Mollusca	963.0	0
ctg10279	73170	0.4165	0	395431	Mollusca	1560.0	1
ctg14953	93257	0.4212	0	337029	Mollusca	2564.0	0
ctg14952	60034	0.3914	0	1838298	no-hit	0.0	0
ctg14950	43890	0.3815	0	471354	Chordata	1422.0	3
ctg14957	48983	0.4128	0	221045	Mollusca	219.0	0
ctg14956	93295	0.4311	0	304214	Mollusca	2577.0	2
ctg62774	5200	0.4104	0	156229	Mollusca	191.0	0
ctg62775	5415	0.4175	0	334674	no-hit	0.0	0
ctg56979	7915	0.4147	0	251147	Mollusca	540.0	0
ctg56976	7745	0.4466	0	355981	no-hit	0.0	0
contig_12800	296255	0.4086	0	351309	Mollusca	4642.0	0
ctg26272	26848	0.4093	0	186874	Mollusca	978.0	0
ctg26271	26251	0.4053	0	37913	Mollusca	826.0	0
ctg26270	27531	0.4329	0	176563	no-hit	0.0	0
ctg26275	27879	0.4372	0	215347	Mollusca	2216.0	0
ctg57002	7460	0.3816	0	330688	no-hit	0.0	0
ctg32489	21687	0.4365	0	206647	Mollusca	1707.0	0
ctg32488	21320	0.4142	0	327938	Mollusca	1426.0	0
ctg57006	4687	0.4146	0	231105	no-hit	0.0	0
ctg52079	10379	0.3923	0	244853	no-hit	0.0	0
ctg32484	23217	0.3947	0	348439	Mollusca	802.0	0
ctg53371	9794	0.4142	0	30475	Mollusca	1011.0	0
ctg52072	9933	0.4467	0	589138	Mollusca	458.0	0
ctg32480	21061	0.4016	0	21618	Mollusca	1499.0	0
ctg52070	9791	0.4054	0	744025	Mollusca	527.0	0
ctg52071	10227	0.4433	0	304505	no-hit	0.0	0
ctg38628	16786	0.4432	0	234539	Mollusca	429.0	0
ctg38626	17619	0.4384	0	394459	Mollusca	141.0	0
ctg38623	43480	0.4173	0	268732	Mollusca	446.0	0
ctg38621	17401	0.4254	0	218897	Mollusca	268.0	0
ctg23731	30532	0.4199	0	45711	Mollusca	871.0	0
ctg23732	43123	0.4051	0	28186	Chordata	1115.0	1
ctg23734	46989	0.4175	0	279157	Mollusca	1446.0	0
ctg28286	24658	0.4159	0	283001	Mollusca	520.0	0
ctg23736	30459	0.4121	0	201601	Chordata	1544.0	1
ctg38197	27215	0.4374	0	277734	Mollusca	767.0	0
ctg38191	33959	0.4041	0	202204	Mollusca	1429.0	1
ctg38190	17400	0.4089	0	244734	Mollusca	658.0	0
contig_29750	831450	0.4134	0	346729	Arthropoda	5766.0	2
ctg56314	8046	0.4461	0	13481	no-hit	0.0	0
tig00027904	1014218	0.4133	0	34662	Arthropoda	5825.0	2
ctg25776	25513	0.4262	0	305243	Mollusca	1168.0	0
ctg25775	47014	0.4173	0	316258	Mollusca	2238.0	1
ctg25774	27149	0.3964	0	20075	Mollusca	621.0	0
ctg25772	28091	0.4164	0	346775	Mollusca	1196.0	0
ctg25770	27911	0.3927	0	248205	no-hit	0.0	0
tig00037432	418684	0.4138	0	32536	Chordata	4649.0	1
ctg62339	5927	0.3982	0	232712	no-hit	0.0	0
ctg39571	17145	0.4081	0	149701	no-hit	0.0	0
tig02169787	580086	0.413	0	336148	Mollusca	6238.0	0
ctg9931	97654	0.4125	0	374664	Mollusca	1398.0	0
ctg9932	72709	0.4084	0	331635	Chordata	1524.0	2
ctg9933	140267	0.4109	0	282343	Mollusca	2315.0	0
ctg9934	135511	0.399	0	328749	Mollusca	2062.0	0
ctg9935	109219	0.4048	0	11299	Mollusca	1501.0	1
ctg8042	87594	0.4036	0	355897	Mollusca	2356.0	0
ctg8041	89562	0.4224	0	343143	Mollusca	2940.0	1
ctg8040	123460	0.4067	0	443284	Arthropoda	5456.0	1
ctg8047	83534	0.4294	0	19089	Mollusca	2062.0	3
ctg8045	112566	0.4065	0	323141	Mollusca	1962.0	3
ctg8049	88601	0.425	0	291867	Mollusca	1133.0	1
ctg25199	27422	0.3917	0	258383	no-hit	0.0	0
ctg25198	69806	0.4223	0	27074	Chordata	6367.0	1
ctg25192	28027	0.4211	0	297611	Mollusca	740.0	0
ctg25191	23951	0.5051	0	621288	no-hit	0.0	0
ctg25195	28978	0.4139	0	371846	Mollusca	1089.0	0
ctg24820	28322	0.4166	0	23625	Mollusca	1694.0	0
ctg24821	78194	0.4219	0	35815	Mollusca	1598.0	0
ctg24823	28884	0.4179	0	185858	Mollusca	1585.0	0
ctg24824	51359	0.3929	0	517037	Chordata	10808.0	1
ctg24826	55278	0.4209	0	23622	Chordata	2656.0	1
ctg52234	10020	0.4229	0	236549	no-hit	0.0	0
tig00043683	240721	0.417	0	262075	Mollusca	3747.0	0
ctg52235	10521	0.4455	0	232639	no-hit	0.0	0
ctg37213	18754	0.45	0	19763	Mollusca	818.0	0
ctg30247	23149	0.4499	0	162165	no-hit	0.0	0
ctg37210	17918	0.4172	0	297862	Mollusca	2454.0	0
ctg30241	23154	0.392	0	250489	Mollusca	226.0	0
ctg30243	33411	0.4283	0	576259	Chordata	1189.0	2
ctg30242	22782	0.4092	0	313424	Mollusca	1087.0	0
ctg37219	18361	0.4052	0	324791	Mollusca	849.0	0
ctg30248	22891	0.4137	0	216838	Chordata	990.0	1
ctg27846	25228	0.4138	0	327387	Mollusca	1578.0	2
ctg27845	25970	0.4318	0	187634	Mollusca	545.0	0
ctg27843	25315	0.4077	0	243389	Mollusca	892.0	0
ctg27842	25931	0.4148	0	244607	Mollusca	1051.0	1
ctg27841	25715	0.4085	0	464335	no-hit	0.0	0
ctg27840	24704	0.4535	0	695826	Mollusca	2064.0	2
tig00398631	838209	0.4145	0	425065	Arthropoda	4994.0	1
ctg37810	16501	0.3931	0	175651	Mollusca	545.0	0
ctg27849	25588	0.4055	0	39942	Chordata	1374.0	1
ctg46501	13130	0.4156	0	188679	Mollusca	630.0	0
ctg17840	41592	0.407	0	382707	Mollusca	1390.0	0
tig00075529	256961	0.4079	23	295706	Mollusca	2771.0	2
ctg55092	8935	0.4279	0	170688	no-hit	0.0	0
ctg17844	100840	0.4106	0	251249	Mollusca	2665.0	1
contig_60781	565539	0.4132	0	341243	Mollusca	4512.0	1
ctg17845	39866	0.4158	0	381958	Mollusca	704.0	0
ctg1583	317297	0.4241	0	378416	Mollusca	3522.0	1
ctg1585	597884	0.4042	0	37176	Mollusca	5904.0	1
ctg1584	287365	0.4212	0	680354	Mollusca	2867.0	1
ctg1587	246089	0.4049	0	361985	Mollusca	2837.0	0
ctg56561	13190	0.4078	0	330067	Mollusca	975.0	1
ctg31116	22872	0.4079	0	38427	Mollusca	773.0	0
ctg55546	8007	0.3984	0	285612	no-hit	0.0	0
ctg31114	21916	0.4355	0	240334	Mollusca	1219.0	2
ctg31112	22474	0.4286	0	285875	Mollusca	2464.0	0
ctg31110	22115	0.3793	0	165442	Mollusca	612.0	0
ctg55549	19396	0.398	0	453365	Mollusca	6284.0	0
ctg55548	6528	0.384	0	257328	no-hit	0.0	0
ctg40984	16342	0.4614	0	129561	Mollusca	206.0	0
ctg40986	16015	0.4392	0	271844	Chordata	834.0	0
ctg40983	15496	0.4706	0	181762	no-hit	0.0	0
ctg18470	82569	0.3997	0	296592	Chordata	1308.0	1
ctg40989	16503	0.4368	0	343507	Mollusca	1854.0	0
ctg18229	42124	0.4258	0	292783	Mollusca	1795.0	2
ctg18228	41047	0.4049	0	282304	Mollusca	1642.0	2
tig00006214	783180	0.4105	0	353366	Chordata	13828.0	0
tig00001240	624434	0.413	0	406195	Mollusca	4285.0	1
tig00006217	775481	0.4098	0	375123	Mollusca	4647.0	0
ctg18221	42089	0.4016	0	761253	Mollusca	1906.0	0
tig02172308	440248	0.4093	0	339628	Chordata	5322.0	2
ctg18225	41118	0.4097	0	263941	Mollusca	761.0	0
ctg18227	77474	0.4124	0	32.52	Arthropoda	1176.0	4
ctg18473	36245	0.4145	0	207308	no-hit	0.0	0
ctg10314	71301	0.4222	0	292776	Mollusca	2252.0	1
ctg30625	22234	0.4465	0	455792	Mollusca	582.0	0
ctg43862	14223	0.4318	0	224288	no-hit	0.0	0
ctg5002	253333	0.41	0	30517	Mollusca	3142.0	1
ctg5003	137046	0.4202	0	362317	Mollusca	2725.0	1
ctg5004	116596	0.4178	0	352271	Mollusca	2930.0	0
ctg5006	386473	0.4027	0	339888	Mollusca	2977.0	2
ctg43864	14543	0.3992	0	1057172	Mollusca	668.0	0
ctg43868	14288	0.4567	0	226184	no-hit	0.0	0
ctg9581	75934	0.4069	0	296467	Mollusca	1998.0	1
ctg9580	123374	0.3934	0	239163	Mollusca	2195.0	2
ctg9583	76086	0.4328	0	30708	Mollusca	594.0	0
ctg9585	75211	0.403	0	368636	Mollusca	1273.0	1
ctg10313	72394	0.4262	0	344999	Mollusca	2938.0	3
ctg4358	125888	0.4139	0	324674	Chordata	2521.0	1
ctg4357	127926	0.4185	0	387147	Mollusca	3318.0	0
ctg4353	149225	0.4314	0	292215	Mollusca	2214.0	1
ctg31802	21396	0.4083	0	202016	no-hit	0.0	0
ctg31803	21853	0.3984	0	264449	Chordata	7394.0	0
ctg31804	21983	0.3976	0	204609	Mollusca	1596.0	0
ctg31806	60905	0.4417	0	294795	Mollusca	2434.0	4
ctg18476	38212	0.4198	0	1213463	Mollusca	565.0	1
ctg9059	77259	0.4176	0	237362	Mollusca	1698.0	0
ctg9058	147785	0.4073	0	296039	Mollusca	3182.0	1
ctg13358	72371	0.4098	0	243607	Mollusca	1845.0	0
ctg9053	78804	0.4288	0	49944	Chordata	5119.0	0
ctg9052	109150	0.4209	0	256821	Mollusca	2001.0	2
ctg13356	87310	0.4265	0	26261	Mollusca	2660.0	0
ctg13357	159657	0.411	0	341358	Mollusca	1692.0	2
ctg13350	90987	0.4229	0	19455	Mollusca	2274.0	0
ctg13351	81402	0.4299	0	368694	Arthropoda	5189.0	2
ctg13352	96021	0.4069	23	393433	Mollusca	804.0	0
ctg13353	64487	0.4109	0	342424	Mollusca	921.0	0
ctg48956	11797	0.4322	0	203314	Mollusca	653.0	0
ctg48957	11755	0.3891	0	176953	no-hit	0.0	0
ctg48955	11546	0.4279	0	284023	Chordata	10054.0	1
ctg5912	109367	0.3981	0	354904	Mollusca	2660.0	0
ctg5913	188325	0.4251	0	34255	Mollusca	4399.0	0
ctg42808	14881	0.4117	0	278662	Mollusca	926.0	0
tig00056779	214756	0.4057	0	249613	Mollusca	3602.0	0
ctg45859	12264	0.4079	0	201153	Mollusca	1601.0	0
ctg1206	269531	0.4042	0	430099	Mollusca	13907.0	0
ctg42800	14969	0.4206	0	263506	Mollusca	590.0	0
ctg45857	13240	0.4168	0	163174	Mollusca	442.0	0
ctg42807	14650	0.3978	0	250353	Chordata	930.0	1
ctg42804	15096	0.4298	0	268681	Mollusca	1630.0	0
ctg42805	14909	0.3886	0	141115	no-hit	0.0	0
ctg41579	15858	0.4036	0	254551	Mollusca	307.0	0
ctg41573	15081	0.3921	0	197716	Mollusca	1138.0	0
ctg41572	15251	0.4101	0	246146	Mollusca	220.0	0
ctg41576	15236	0.3969	0	718168	Mollusca	1469.0	0
contig_34420	534918	0.4095	0	405594	Mollusca	4086.0	0
ctg3519	334144	0.4172	0	301187	Arthropoda	3943.0	2
ctg3512	238290	0.4408	0	350623	Chordata	4989.0	1
ctg3514	172287	0.4155	0	324409	Mollusca	2747.0	1
ctg3517	188154	0.4077	0	448487	Mollusca	2704.0	1
contig_27908	380940	0.417	0	240617	Mollusca	2224.0	3
ctg33185	19755	0.3858	0	185507	Arthropoda	4208.0	1
ctg33184	20446	0.4202	0	271513	Mollusca	485.0	0
ctg33180	20920	0.4174	0	195162	Mollusca	1072.0	0
ctg44896	13189	0.4404	0	230817	no-hit	0.0	0
ctg44894	13247	0.4301	0	10603	no-hit	0.0	0
ctg40736	16007	0.4362	0	339185	Mollusca	394.0	0
ctg33235	20936	0.4334	0	301972	no-hit	0.0	0
ctg33234	20835	0.391	0	203243	Mollusca	462.0	0
contig_22993	355929	0.4123	0	298851	Mollusca	7064.0	0
ctg43041	29123	0.4157	0	369535	Mollusca	1226.0	0
ctg43042	14509	0.4144	0	151671	no-hit	0.0	0
ctg43047	50408	0.4278	0	213025	Mollusca	1293.0	0
tig02170041	440716	0.4085	0	392184	Arthropoda	3886.0	4
ctg51895	10089	0.442	0	245255	Arthropoda	939.0	1
ctg51897	10165	0.4031	0	216049	Mollusca	1107.0	0
ctg51890	10122	0.3968	0	251658	Mollusca	353.0	0
ctg51892	17523	0.4072	0	155387	Mollusca	641.0	2
ctg10079	69881	0.4229	0	277114	Mollusca	1808.0	1
ctg30766	23100	0.4273	0	271429	Mollusca	607.0	0
ctg10075	73573	0.4207	0	214935	Mollusca	1089.0	0
ctg10076	112646	0.4204	0	287459	Mollusca	1913.0	0
ctg10070	106049	0.4165	0	352665	Mollusca	1853.0	1
ctg10071	96724	0.4305	0	425969	Mollusca	2412.0	0
ctg10072	113269	0.4174	0	264992	Mollusca	2903.0	0
ctg10073	200715	0.4113	0	246875	Chordata	2475.0	1
ctg46130	12307	0.4371	0	251469	Mollusca	852.0	0
ctg46134	13412	0.3881	0	188927	no-hit	0.0	0
tig00083542	224484	0.395	0	274953	Arthropoda	3166.0	2
tig00099015	206309	0.4141	0	307418	Mollusca	2448.0	1
ctg52270	10272	0.4685	0	132103	Mollusca	183.0	0
ctg52278	9946	0.3887	0	222302	Mollusca	585.0	0
ctg15514	48325	0.407	0	340592	Mollusca	2376.0	1
ctg15515	48577	0.3954	0	206444	Chordata	6742.0	0
ctg15517	48914	0.4354	0	338742	Mollusca	925.0	0
ctg15511	67462	0.421	0	347129	Mollusca	2355.0	0
ctg15512	87323	0.4149	0	213737	Mollusca	1540.0	3
ctg15519	48423	0.4311	0	547526	Mollusca	375.0	0
contig_28690	272771	0.4151	0	37538	Mollusca	4090.0	0
ctg53634	9586	0.403	0	29522	Mollusca	757.0	0
ctg53632	9099	0.4432	0	203423	no-hit	0.0	0
ctg46798	12505	0.3897	0	246535	Chordata	2097.0	0
ctg53630	9136	0.4191	0	333539	Mollusca	176.0	0
ctg9562	70184	0.4606	0	336295	Mollusca	1138.0	0
ctg46795	10223	0.4662	0	218316	Mollusca	882.0	0
ctg46792	13377	0.4292	0	320782	Mollusca	814.0	0
ctg46793	12551	0.4121	0	169998	Mollusca	202.0	0
ctg53639	9514	0.4093	0	264456	no-hit	0.0	0
contig_27125	251258	0.4104	0	202916	Mollusca	2703.0	3
ctg54947	8656	0.4088	0	158656	Mollusca	1092.0	0
ctg45173	12709	0.4354	0	221622	Mollusca	1915.0	0
tig02171876	556263	0.4088	0	364119	Mollusca	5731.0	1
ctg10928	78860	0.4054	0	320711	Mollusca	1609.0	0
ctg10926	199403	0.4067	0	297553	Mollusca	3277.0	0
ctg10924	102511	0.4304	0	29.45	Mollusca	7446.0	0
ctg10925	67646	0.4277	0	312862	Mollusca	3223.0	0
ctg45171	37131	0.4228	0	386611	Mollusca	257.0	0
ctg28912	23529	0.4126	0	264014	Mollusca	400.0	0
ctg49651	11518	0.4345	0	262753	Mollusca	669.0	0
ctg28915	23102	0.4087	0	185681	Mollusca	1292.0	0
ctg28916	24200	0.4039	0	349287	no-hit	0.0	0
ctg28917	24318	0.4126	0	287753	no-hit	0.0	0
ctg28918	23801	0.4182	0	461166	Mollusca	752.0	0
ctg28919	31870	0.4149	0	215738	Mollusca	1134.0	1
ctg46864	12850	0.4764	0	200664	Mollusca	1100.0	0
ctg46867	21157	0.4113	0	417458	Chordata	1097.0	1
ctg46860	12775	0.39	0	210344	Mollusca	847.0	0
ctg46868	13040	0.4121	0	272021	Mollusca	386.0	0
ctg46869	12794	0.3693	0	207008	Mollusca	171.0	0
ctg12564	67690	0.3984	0	236846	Mollusca	1694.0	0
ctg12565	93424	0.4121	0	503669	Arthropoda	2572.0	2
ctg12566	126747	0.4119	0	39285	Mollusca	2132.0	1
ctg12567	69903	0.426	0	321598	Mollusca	1522.0	2
ctg12560	96687	0.3933	0	270997	Mollusca	2526.0	2
ctg12562	77069	0.4066	0	321465	Mollusca	2997.0	1
ctg12568	60061	0.3965	0	208218	Mollusca	1788.0	2
ctg12569	112651	0.4203	0	286046	Mollusca	3329.0	0
contig_35294	562918	0.4103	0	397052	Mollusca	4129.0	1
ctg58629	7241	0.4059	0	113837	no-hit	0.0	0
tig00023274	306505	0.4057	0	242647	Mollusca	3310.0	2
ctg58620	7245	0.3879	0	219745	Arthropoda	563.0	1
ctg54361	9074	0.4063	0	644089	no-hit	0.0	0
ctg54363	8239	0.4741	0	234228	no-hit	0.0	0
tig02169230	245475	0.4093	0	396524	Mollusca	3065.0	1
ctg52940	9951	0.3855	0	202752	Mollusca	2643.0	0
tig00396701	410243	0.4152	0	335286	Chordata	7626.0	0
ctg51705	10771	0.4096	0	331672	Mollusca	810.0	0
ctg51707	22443	0.4291	0	258292	Mollusca	1693.0	1
ctg51703	11452	0.4282	0	20671	Arthropoda	1063.0	2
ctg44794	9512	0.3908	0	36869	no-hit	0.0	0
tig02186955	318328	0.4136	0	274309	Mollusca	3884.0	0
ctg44792	13367	0.4099	0	323137	Mollusca	287.0	0
ctg44793	13375	0.4079	0	378677	no-hit	0.0	0
ctg48238	12251	0.4167	0	23938	no-hit	0.0	0
ctg44798	12336	0.4335	0	537699	Mollusca	595.0	0
ctg44799	21145	0.4199	0	232561	Mollusca	1086.0	0
ctg7669	88188	0.4032	0	548269	Mollusca	2533.0	0
ctg7662	299068	0.4156	0	207532	Chordata	3341.0	3
ctg7660	89866	0.4177	0	188996	Mollusca	1421.0	1
ctg7661	144865	0.423	0	347219	Mollusca	2275.0	1
ctg7667	89226	0.4338	0	314419	Mollusca	3706.0	0
ctg7664	87385	0.4272	0	37478	Mollusca	2919.0	0
ctg8002	156863	0.3981	0	334311	Arthropoda	4579.0	1
ctg21186	64496	0.4076	0	197338	Arthropoda	3873.0	1
ctg21187	34831	0.4133	0	232726	Mollusca	2002.0	1
ctg21180	33626	0.4419	0	393236	Mollusca	936.0	0
ctg8001	88584	0.4166	0	219563	Mollusca	3666.0	0
tig00025949	322197	0.4042	0	341139	Arthropoda	4906.0	2
ctg21183	34086	0.4212	0	230522	Mollusca	14523.0	0
ctg57703	7209	0.4591	0	305877	Mollusca	159.0	0
contig_11084	265623	0.4181	0	283421	Mollusca	3045.0	2
ctg21188	33646	0.3915	0	344756	Arthropoda	1386.0	1
ctg21189	34419	0.4248	0	209833	Platyhelminthes	1506.0	3
ctg44428	13226	0.4094	0	274045	Mollusca	667.0	0
tig00012443	883435	0.4122	0	375037	Mollusca	3838.0	1
ctg20851	35807	0.4157	0	171989	Mollusca	1021.0	0
ctg20850	51269	0.4103	23	21921	Mollusca	764.0	0
ctg44421	13664	0.4458	0	326349	Mollusca	799.0	0
ctg44426	14012	0.3935	0	203243	no-hit	0.0	0
ctg20857	33591	0.4154	0	392981	Chordata	302.0	1
ctg20856	83167	0.435	0	306929	Mollusca	1497.0	0
contig_10934	379149	0.4058	0	323033	Mollusca	3854.0	2
ctg21458	44555	0.4125	0	325063	Mollusca	3213.0	0
ctg21459	33404	0.4056	0	236387	Mollusca	791.0	0
ctg21453	34355	0.4234	0	222827	Mollusca	3257.0	0
ctg21451	35437	0.3854	0	239411	Mollusca	643.0	0
ctg21456	34926	0.3932	0	91508	Mollusca	586.0	0
ctg21457	35315	0.4038	0	22962	Mollusca	1566.0	1
ctg21454	67040	0.407	0	203698	Mollusca	2265.0	0
ctg21455	58066	0.4339	0	549871	Mollusca	2303.0	0
ctg29668	36919	0.4025	0	371098	Mollusca	244.0	0
contig_11332	693295	0.4164	0	469963	Mollusca	3624.0	1
ctg29664	21796	0.4429	0	173051	no-hit	0.0	0
ctg29667	23850	0.4436	0	247422	Mollusca	226.0	0
ctg29666	23838	0.4462	0	312585	no-hit	0.0	0
ctg29661	56992	0.41	0	423536	Mollusca	1716.0	2
ctg20587	36205	0.406	0	210948	Mollusca	2396.0	1
ctg20586	35973	0.4247	0	288828	Mollusca	1817.0	0
ctg20581	35585	0.4278	0	243223	Mollusca	669.0	2
ctg20580	53536	0.401	0	295156	Mollusca	387.0	0
ctg61121	12784	0.4133	0	331821	no-hit	0.0	0
tig00029622	503565	0.4147	0	420612	Mollusca	7010.0	0
ctg17006	58922	0.4371	0	632234	Mollusca	1001.0	0
ctg17001	67783	0.4187	0	178132	Mollusca	8898.0	0
ctg17002	44053	0.4002	0	200354	Mollusca	1487.0	0
tig00064912	391643	0.422	100	331995	Mollusca	11952.0	0
tig02186595	374343	0.4098	0	340778	Mollusca	7038.0	1
ctg17008	43566	0.4402	0	284458	Chordata	1126.0	1
ctg6131	134364	0.405	0	345409	Chordata	3684.0	1
ctg6130	133379	0.4026	0	501916	Mollusca	7589.0	0
ctg6133	147616	0.4247	0	581679	Mollusca	3546.0	3
ctg6132	121796	0.4138	0	373746	Arthropoda	6165.0	2
ctg54844	8823	0.4027	0	165772	Mollusca	134.0	0
ctg55702	9030	0.3944	0	795193	Mollusca	198.0	1
ctg55706	7801	0.4093	0	199124	no-hit	0.0	0
tig02173562	456530	0.411	0	333254	Mollusca	4029.0	1
tig00402531	485696	0.4214	0	373868	Mollusca	4181.0	1
ctg20329	36346	0.4046	0	229247	Mollusca	523.0	0
ctg24669	29002	0.4001	0	273857	Mollusca	1066.0	3
ctg20323	36258	0.4179	0	18848	Mollusca	907.0	0
ctg20322	36286	0.4027	0	315531	Mollusca	1334.0	0
ctg20321	86360	0.3889	0	449557	Mollusca	1212.0	0
ctg20320	36517	0.4131	0	239949	no-hit	0.0	0
ctg20327	35736	0.4203	0	337375	Mollusca	1632.0	0
ctg20326	36542	0.4166	0	217838	Mollusca	1322.0	1
ctg20324	37127	0.4242	0	361204	Chordata	2221.0	1
ctg28138	25294	0.4098	0	456946	Mollusca	733.0	0
ctg28139	24688	0.3988	0	225222	no-hit	0.0	0
ctg34455	19862	0.4231	0	273353	Mollusca	655.0	0
ctg34457	19336	0.3958	0	189142	Chordata	371.0	1
ctg34450	20056	0.4261	0	280798	Mollusca	897.0	0
ctg34451	20499	0.4381	0	284166	Mollusca	498.0	0
ctg28130	24495	0.3973	0	250686	Mollusca	1320.0	0
ctg34453	20150	0.405	0	270849	no-hit	0.0	0
tig00400274	460193	0.4145	0	304034	Mollusca	2224.0	3
tig00400270	331009	0.418	0	402265	Mollusca	3844.0	2
ctg36343	18992	0.3877	0	348236	Mollusca	403.0	0
ctg36341	19184	0.4227	0	241209	Mollusca	959.0	1
ctg36344	18955	0.4199	0	292634	Chordata	834.0	2
ctg36345	18704	0.4274	0	293141	Mollusca	575.0	0
ctg10386	70212	0.4256	0	273561	Chordata	1651.0	1
ctg36349	18803	0.4193	0	299827	no-hit	0.0	0
ctg10387	89596	0.4187	0	299735	Mollusca	3566.0	0
ctg32852	20910	0.4009	0	341626	Mollusca	1125.0	0
ctg32853	21224	0.3958	0	161381	no-hit	0.0	0
ctg32850	21296	0.4303	0	174808	Mollusca	650.0	0
ctg32851	20545	0.4435	0	241743	Mollusca	171.0	0
ctg32856	21453	0.4116	0	311062	Mollusca	415.0	0
ctg32854	22570	0.4642	0	168699	Mollusca	187.0	0
ctg51288	10782	0.4568	0	256401	Mollusca	145.0	0
ctg51280	11248	0.4186	0	192866	Mollusca	505.0	0
ctg51282	10596	0.4357	0	314964	Chordata	276.0	0
ctg51283	10733	0.4237	0	309003	Mollusca	658.0	0
ctg51284	10486	0.388	0	246611	no-hit	0.0	0
ctg51285	37903	0.3997	0	710287	Mollusca	1516.0	0
ctg28519	34852	0.3909	0	333168	Mollusca	588.0	0
ctg27319	26000	0.4182	0	243157	Chordata	1429.0	1
ctg27313	25896	0.4337	0	212934	Mollusca	404.0	0
ctg27312	26276	0.4065	0	257137	Mollusca	1277.0	0
ctg27311	25060	0.4328	0	281311	Arthropoda	17873.0	1
ctg27315	19616	0.3985	0	326312	Mollusca	171.0	0
tig00074825	207697	0.4291	0	30848	Mollusca	3766.0	0
ctg28515	23827	0.4131	0	326592	Mollusca	744.0	0
tig00018277	587778	0.4073	0	352223	Chordata	7220.0	0
ctg9219	78940	0.4098	0	368902	Mollusca	2371.0	0
contig_6264	278959	0.4092	0	305235	Mollusca	2886.0	1
ctg9210	135122	0.4164	0	325732	Chordata	2558.0	1
ctg9213	114881	0.4008	0	208806	Mollusca	3229.0	0
ctg9212	193798	0.4274	0	468447	Mollusca	2630.0	1
ctg9214	85132	0.4179	0	355109	Mollusca	1844.0	0
ctg11194	66588	0.4018	0	288718	Mollusca	2915.0	0
ctg37430	18093	0.4311	0	210771	no-hit	0.0	0
ctg37437	17929	0.4091	0	24606	Arthropoda	5324.0	2
ctg37435	51947	0.4256	23	197693	Mollusca	1463.0	1
ctg37434	17396	0.4153	0	239829	Mollusca	831.0	0
ctg11196	68219	0.4135	0	358327	Mollusca	2387.0	0
ctg22368	37912	0.4486	0	188342	Mollusca	484.0	0
tig00005458	607627	0.4025	0	574725	Mollusca	3157.0	3
ctg18647	39720	0.4104	0	227343	Mollusca	625.0	0
ctg22363	52070	0.4159	0	155676	Mollusca	2743.0	0
ctg7760	118537	0.4181	0	291437	Mollusca	4477.0	0
ctg22365	99628	0.4212	0	218582	Mollusca	2956.0	1
ctg22364	47975	0.4063	0	195978	Mollusca	1720.0	1
contig_28867	848974	0.4153	0	33927	Chordata	2448.0	3
ctg11191	92912	0.4128	0	350516	Mollusca	2485.0	0
ctg35493	18595	0.4683	0	471214	Mollusca	479.0	0
ctg35492	18690	0.3867	0	168772	Mollusca	1120.0	0
ctg35490	18696	0.437	0	37285	Mollusca	1599.0	0
ctg35497	19615	0.4248	0	548963	Mollusca	613.0	0
ctg35495	18387	0.4035	0	29164	Mollusca	1206.0	0
ctg62340	5698	0.4142	0	253293	no-hit	0.0	0
ctg32146	21546	0.3957	0	265385	Chordata	1604.0	1
ctg32140	21727	0.3873	0	22818	no-hit	0.0	0
ctg32141	22315	0.4196	0	260774	Mollusca	575.0	0
ctg23943	30634	0.4444	0	233088	Chordata	1126.0	1
ctg23946	41071	0.3921	0	247252	Mollusca	1101.0	2
ctg22097	30305	0.4101	0	41399	Mollusca	139.0	0
ctg22096	32977	0.4071	0	22131	Mollusca	1803.0	0
ctg22095	33320	0.4029	0	290167	Mollusca	2039.0	0
ctg22093	61799	0.4116	23	251981	Mollusca	1982.0	2
ctg22091	32003	0.4232	0	216887	Mollusca	877.0	0
ctg3350	167507	0.4144	0	358244	Mollusca	2169.0	0
ctg38013	17411	0.4353	0	394215	no-hit	0.0	0
ctg38016	17034	0.4129	0	223962	Mollusca	241.0	0
ctg9972	72449	0.3997	0	405383	Chordata	2050.0	2
ctg9973	172601	0.4011	0	32462	Mollusca	4932.0	1
ctg39947	16215	0.4212	0	244634	no-hit	0.0	0
ctg39940	16763	0.4126	0	303118	Arthropoda	3404.0	3
ctg39949	16487	0.4044	0	272094	Mollusca	1477.0	0
ctg39948	16279	0.3981	0	361761	Mollusca	161.0	0
ctg33439	25033	0.4115	0	345034	Mollusca	145.0	0
ctg33436	17073	0.3944	0	68586	no-hit	0.0	0
ctg33435	78788	0.38	0	7586	Chordata	1362.0	4
ctg33431	20208	0.4063	0	321907	no-hit	0.0	0
ctg33430	34905	0.4131	0	275925	Mollusca	3330.0	0
ctg21841	71204	0.4221	0	260388	Mollusca	1766.0	0
ctg21840	34089	0.4139	0	351668	Mollusca	1559.0	0
ctg21845	24707	0.4155	0	439137	Chordata	1446.0	3
ctg21844	88924	0.4093	0	211278	Mollusca	1674.0	2
ctg21846	34695	0.4136	0	366839	Mollusca	1059.0	0
ctg21849	33674	0.39	0	24271	Chordata	1126.0	1
ctg16717	99824	0.4019	0	261139	Mollusca	1297.0	0
tig00401673	248439	0.4171	0	318399	Mollusca	3772.0	1
ctg7300	90248	0.405	0	400727	Mollusca	1824.0	2
ctg7305	275160	0.4178	0	181039	Mollusca	4494.0	0
tig00009014	302898	0.4171	0	446353	Chordata	6554.0	1
ctg47229	12074	0.4691	0	236974	Chordata	800.0	4
ctg39055	17115	0.4127	0	460757	Mollusca	1727.0	2
ctg4968	141240	0.4175	0	315056	Mollusca	2497.0	2
ctg4964	129259	0.4201	0	299366	Mollusca	2067.0	0
ctg4966	236235	0.4204	0	331849	Mollusca	3433.0	1
ctg4960	150506	0.4075	0	329282	Mollusca	2170.0	1
ctg47224	8526	0.4112	0	383248	no-hit	0.0	0
ctg30160	22568	0.4108	0	400852	no-hit	0.0	0
ctg30161	23377	0.4098	0	319704	Chordata	12728.0	0
ctg30162	24026	0.414	0	258862	Mollusca	1380.0	0
ctg30163	23494	0.4177	0	331601	Arthropoda	745.0	0
tig00008941	342166	0.4125	0	316151	Mollusca	3653.0	1
ctg30168	23465	0.4173	0	37.57	Mollusca	1001.0	0
ctg30169	23687	0.4127	0	296361	Mollusca	1503.0	0
ctg37394	17417	0.4192	0	213143	Mollusca	1848.0	0
ctg37392	18076	0.4467	0	237557	Mollusca	4026.0	0
tig00397350	237877	0.4095	0	362522	Chordata	7661.0	1
ctg41978	45554	0.4054	0	250356	Mollusca	2453.0	0
ctg41971	15766	0.4184	0	280102	Chordata	1695.0	1
ctg14004	54142	0.4105	0	295315	Mollusca	1827.0	1
ctg14006	53780	0.3934	0	292351	no-hit	0.0	0
ctg14001	60342	0.3837	0	214177	Mollusca	836.0	1
ctg14000	164683	0.4093	0	148073	Mollusca	2789.0	1
ctg14003	54606	0.3919	0	250572	Mollusca	2575.0	0
ctg11235	89305	0.426	0	334533	Mollusca	1801.0	2
ctg18586	39646	0.4095	0	520761	Mollusca	655.0	0
ctg18581	106249	0.4208	0	359508	Chordata	2306.0	1
ctg15750	198890	0.4105	0	303744	Mollusca	3137.0	0
ctg18583	40273	0.3978	0	302286	Arthropoda	3343.0	2
ctg11239	64378	0.3964	0	317766	Mollusca	2622.0	0
ctg11238	140764	0.4017	0	1196331	Mollusca	3510.0	0
ctg6795	152777	0.4233	0	256409	Mollusca	2377.0	0
ctg47435	12063	0.4602	0	186496	no-hit	0.0	0
ctg47431	12356	0.4112	0	259383	Mollusca	399.0	0
ctg42308	15222	0.4527	0	25287	Mollusca	511.0	0
ctg12764	55959	0.4696	0	215185	Mollusca	185.0	0
ctg12765	59518	0.4098	0	319964	Mollusca	1694.0	2
ctg12760	58724	0.4071	0	268852	Mollusca	1108.0	0
ctg42303	15210	0.4477	0	808513	no-hit	0.0	0
ctg12769	59838	0.4023	0	231597	Mollusca	2255.0	1
ctg41129	23382	0.4489	0	326571	Mollusca	176.0	0
ctg18059	167215	0.4073	0	192769	Mollusca	6040.0	0
ctg51408	10780	0.3943	0	447888	Mollusca	566.0	0
ctg18052	102489	0.4004	0	299702	Chordata	1178.0	2
ctg18053	114052	0.4148	0	236638	Arthropoda	3016.0	2
ctg18051	38142	0.434	0	364309	Mollusca	485.0	0
ctg18056	41868	0.415	0	217847	Cnidaria	1735.0	3
ctg18057	53961	0.3929	0	164725	Mollusca	1334.0	0
ctg18054	70169	0.4054	0	304136	Mollusca	1897.0	0
ctg18055	74800	0.4082	0	263684	Mollusca	3264.0	1
tig00012179	394012	0.4164	0	519412	Mollusca	2112.0	1
ctg54076	8982	0.4195	0	275978	Mollusca	640.0	0
ctg41122	15658	0.417	0	227394	Mollusca	668.0	0
ctg2474	594206	0.4184	0	331829	Mollusca	3444.0	1
ctg41226	15212	0.4389	0	322776	Mollusca	372.0	0
scaffold_45183	233345	0.4181	100	375749	Mollusca	2903.0	0
ctg41127	15565	0.4142	0	262402	Mollusca	363.0	0
contig_56995	470626	0.4046	0	424843	Mollusca	3143.0	2
ctg4145	360479	0.4113	0	254006	Mollusca	3057.0	2
ctg4142	283712	0.4185	0	360489	Mollusca	3751.0	0
ctg4140	153091	0.4037	0	336327	Mollusca	3694.0	1
ctg4141	173054	0.4382	0	344689	Mollusca	3200.0	0
ctg13494	55445	0.4212	0	286255	Mollusca	1435.0	1
ctg13493	79713	0.43	0	295105	Mollusca	1561.0	0
ctg44225	13516	0.4462	0	202885	Mollusca	1695.0	0
ctg44220	14245	0.3912	0	332884	Mollusca	488.0	0
ctg13498	55862	0.4015	0	368685	Mollusca	1109.0	0
ctg13145	57438	0.4145	0	298186	Mollusca	1199.0	3
ctg13147	55959	0.4319	0	436699	Mollusca	806.0	0
ctg13146	122287	0.4102	0	473964	Mollusca	1220.0	0
ctg13141	93125	0.4057	0	318494	Mollusca	842.0	2
ctg13142	190008	0.417	0	358952	Mollusca	2966.0	1
contig_4609	481999	0.4041	0	328607	Chordata	5811.0	2
ctg16515	39537	0.342	0	390932	Mollusca	670.0	0
ctg16514	87097	0.4038	0	321506	Mollusca	1315.0	1
ctg16516	46251	0.4008	0	287826	Mollusca	335.0	0
ctg16510	45327	0.3963	0	265036	Mollusca	910.0	0
ctg17646	40367	0.4206	0	244414	Mollusca	3400.0	0
ctg17644	43492	0.4134	0	372282	Mollusca	847.0	0
ctg17645	42858	0.4192	0	407091	Mollusca	816.0	0
ctg17642	42779	0.3922	0	334141	Mollusca	1745.0	0
ctg17648	76292	0.4118	0	312569	Mollusca	2038.0	0
ctg49959	11156	0.3952	0	204059	Mollusca	278.0	0
ctg49957	10201	0.4238	0	246646	no-hit	0.0	0
ctg49950	11250	0.4186	0	177225	Mollusca	302.0	0
ctg44918	13813	0.4164	0	226852	Mollusca	244.0	0
ctg44916	13912	0.3985	0	44577	Mollusca	499.0	0
ctg44917	13400	0.4357	0	402843	Mollusca	137.0	0
ctg44911	13493	0.4456	0	221757	Mollusca	1684.0	0
tig00400072	412902	0.4103	0	378949	Mollusca	3316.0	1
tig00400074	277349	0.4152	0	26286	Arthropoda	3383.0	2
ctg40211	16400	0.4198	0	181905	Mollusca	905.0	0
ctg40214	15182	0.4636	0	342524	no-hit	0.0	0
ctg40216	23805	0.3805	0	346145	Annelida	454.0	1
ctg40219	16257	0.437	0	203274	Chordata	870.0	1
ctg33371	20816	0.4216	0	243456	Mollusca	1450.0	0
tig00001904	477717	0.4025	0	368305	Mollusca	2806.0	4
ctg33376	20007	0.4244	0	936899	Mollusca	356.0	0
ctg33377	36568	0.4182	0	290231	Mollusca	1863.0	0
ctg26423	25689	0.4389	0	344159	no-hit	0.0	0
ctg26427	27267	0.3997	0	292701	no-hit	0.0	0
ctg26425	26142	0.4436	0	173195	no-hit	0.0	0
tig00402505	396128	0.4078	0	258044	Mollusca	2310.0	3
ctg13779	54341	0.4066	0	361344	Mollusca	1171.0	0
ctg29258	24008	0.4286	0	34452	Chordata	733.0	1
ctg13777	157694	0.4166	0	509764	Mollusca	5776.0	0
tig00052734	225310	0.4127	0	444586	Mollusca	3405.0	2
ctg57383	6771	0.4767	0	1072139	no-hit	0.0	0
ctg63014	5134	0.3851	0	156209	no-hit	0.0	0
ctg64040	5146	0.4223	0	170012	no-hit	0.0	0
ctg28037	23332	0.4467	0	280272	Mollusca	772.0	0
ctg62947	4825	0.4582	0	307756	no-hit	0.0	0
ctg62948	4992	0.4415	0	155287	Mollusca	152.0	0
ctg51910	9840	0.4136	0	17132	Mollusca	163.0	0
ctg51912	10020	0.3975	0	167648	no-hit	0.0	0
ctg51917	31759	0.4104	0	269245	Mollusca	834.0	0
ctg51918	9787	0.3913	0	21588	Mollusca	371.0	0
ctg51919	10323	0.4326	0	237389	no-hit	0.0	0
tig00018075	435063	0.4104	0	471062	Mollusca	6132.0	0
contig_6064	361425	0.4078	0	35365	Arthropoda	14436.0	1
tig00401853	799671	0.4065	0	35741	Arthropoda	12970.0	2
ctg62532	4858	0.3934	0	377641	no-hit	0.0	0
ctg32370	51689	0.4379	0	171245	Mollusca	1739.0	1
ctg536	356020	0.4085	0	38371	Chordata	4851.0	1
ctg52754	9912	0.4112	0	20.37	Mollusca	687.0	0
ctg52750	9719	0.4031	0	263624	Mollusca	776.0	0
tig00054194	331948	0.4149	0	402929	Mollusca	3192.0	0
ctg11179	90140	0.4082	0	217044	Mollusca	1574.0	0
ctg11176	94124	0.42	0	23198	Mollusca	2845.0	1
ctg11177	61981	0.4133	0	221357	Mollusca	2508.0	1
ctg11175	65127	0.4073	0	245573	Mollusca	1322.0	1
ctg11172	71241	0.3957	0	48663	Mollusca	1951.0	1
ctg11170	65315	0.4052	0	32175	Mollusca	1480.0	0
tig00055826	228683	0.4197	0	307732	Arthropoda	14040.0	1
ctg280	339835	0.412	0	311919	Mollusca	3292.0	2
ctg283	340947	0.4245	0	373376	Mollusca	3671.0	1
tig00091438	334573	0.4159	0	350547	Mollusca	4423.0	0
ctg62052	5392	0.4557	0	179365	Mollusca	326.0	0
contig_3258	330287	0.4026	0	37589	Mollusca	4442.0	0
tig00049313	510448	0.4133	0	341359	Arthropoda	13700.0	1
ctg59858	6008	0.4251	0	195646	no-hit	0.0	0
ctg59853	6204	0.4313	0	311298	no-hit	0.0	0
ctg57989	6932	0.438	0	248341	Mollusca	679.0	0
tig00395755	854063	0.4042	0	343656	Mollusca	2897.0	5
ctg57985	6959	0.4298	0	441516	Chordata	312.0	1
ctg49206	11853	0.4286	0	360771	no-hit	0.0	0
ctg57987	7377	0.4036	0	295482	Mollusca	1199.0	0
contig_7008	259121	0.3993	0	33338	Mollusca	2762.0	1
ctg53401	9189	0.3984	0	178761	no-hit	0.0	0
ctg53402	9448	0.428	0	261579	no-hit	0.0	0
ctg53407	14566	0.4646	0	397869	no-hit	0.0	0
contig_28334	417081	0.4237	0	376782	Mollusca	3480.0	2
ctg50669	11062	0.4427	0	161675	Mollusca	368.0	0
ctg50668	16612	0.4134	0	176986	no-hit	0.0	0
ctg61622	6153	0.4404	0	174592	Mollusca	503.0	0
ctg50665	13193	0.3637	0	30597	no-hit	0.0	0
ctg50664	11659	0.4079	0	19232	no-hit	0.0	0
ctg50666	22598	0.3898	0	208324	Mollusca	178.0	0
ctg61629	5885	0.4199	0	511473	no-hit	0.0	0
ctg50663	10937	0.3974	0	167877	Mollusca	396.0	0
ctg50662	11232	0.4147	0	162408	Mollusca	239.0	0
tig00400810	487621	0.4194	0	346776	Mollusca	3876.0	2
ctg59584	4276	0.3644	0	296118	no-hit	0.0	0
ctg54751	8932	0.4109	0	215222	Mollusca	376.0	0
ctg54750	9022	0.4458	0	380138	Mollusca	544.0	0
ctg54753	8990	0.4014	0	303869	no-hit	0.0	0
ctg25303	40742	0.3883	0	318966	Mollusca	840.0	0
ctg25300	28349	0.4286	0	21078	Mollusca	1320.0	0
ctg25301	27219	0.432	0	374229	Mollusca	187.0	0
ctg45630	13236	0.4066	0	339824	no-hit	0.0	0
ctg25307	28607	0.4129	0	201233	Mollusca	1204.0	1
ctg25304	28536	0.4159	0	373904	Mollusca	226.0	0
ctg25305	29547	0.4251	0	197299	Mollusca	580.0	3
ctg25308	46186	0.4012	0	232917	Mollusca	1356.0	1
ctg25309	25664	0.4095	0	231788	Chordata	1122.0	1
ctg45638	12620	0.4522	0	292628	no-hit	0.0	0
contig_11983	325783	0.4071	0	268416	Mollusca	3161.0	0
ctg48007	11804	0.366	0	0.3782	no-hit	0.0	0
ctg48005	12486	0.4162	0	173147	no-hit	0.0	0
ctg48000	12157	0.4308	0	243189	Mollusca	2668.0	0
ctg48001	11804	0.4346	0	307815	no-hit	0.0	0
tig00030001	434781	0.4145	0	32408	Chordata	2830.0	1
ctg48008	12141	0.456	0	205274	no-hit	0.0	0
ctg62475	14140	0.4199	0	477937	no-hit	0.0	0
ctg36935	18960	0.4785	0	615563	Mollusca	492.0	0
ctg36934	12145	0.4108	0	210842	no-hit	0.0	0
ctg36936	17984	0.3853	0	199638	Mollusca	1220.0	0
ctg36931	25919	0.4127	0	314755	no-hit	0.0	0
ctg36938	34041	0.4198	0	22685	Mollusca	716.0	0
tig00056844	489409	0.4143	0	320354	Mollusca	4287.0	2
ctg19088	39257	0.4095	0	382123	Chordata	1449.0	3
ctg19089	38391	0.4023	0	232849	Mollusca	1091.0	0
ctg19086	66031	0.4055	0	270535	Mollusca	2188.0	0
ctg19087	39842	0.3849	0	230306	Mollusca	1929.0	0
ctg19084	39236	0.4068	0	271482	Mollusca	1837.0	0
ctg19085	38817	0.4026	0	301052	Mollusca	1680.0	0
ctg19083	54713	0.4134	0	291037	Mollusca	1552.0	0
ctg19081	38883	0.4189	0	351818	Mollusca	1167.0	1
ctg61080	6738	0.4323	0	631109	no-hit	0.0	0
ctg61083	5929	0.419	0	26074	Mollusca	462.0	0
ctg61082	6100	0.42	0	200013	no-hit	0.0	0
ctg61084	6133	0.4244	0	104078	Mollusca	411.0	0
ctg16258	144480	0.4055	0	326147	Mollusca	2730.0	2
ctg16259	87239	0.423	0	294018	Chordata	4687.0	1
ctg16257	45971	0.4221	0	320941	Mollusca	2054.0	0
ctg16255	45975	0.3967	0	228549	Mollusca	4823.0	1
ctg16252	45673	0.4077	0	282835	Mollusca	1827.0	2
ctg16251	45716	0.4062	0	377475	Mollusca	1619.0	0
ctg7149	94530	0.4092	0	325235	Mollusca	2115.0	0
ctg7148	95795	0.3982	0	382214	Chordata	3681.0	1
ctg59322	6749	0.3809	0	378533	Mollusca	560.0	0
ctg59321	6837	0.4114	0	163436	no-hit	0.0	0
ctg7144	136951	0.3936	0	314971	Mollusca	2760.0	0
ctg7143	154847	0.4266	0	328901	Mollusca	3396.0	0
ctg59326	6686	0.4168	0	308885	no-hit	0.0	0
ctg7140	102939	0.4026	0	303393	Mollusca	2483.0	1
tig00398865	1094907	0.4173	0	406227	Mollusca	3769.0	2
tig00398864	395005	0.4036	0	406715	Mollusca	3003.0	1
ctg51138	10694	0.437	0	557231	no-hit	0.0	0
contig_3264	217201	0.407	0	492669	Mollusca	1657.0	0
ctg51132	10704	0.4273	0	372809	Mollusca	139.0	0
ctg51131	10871	0.4528	0	398972	no-hit	0.0	0
ctg19554	37957	0.3958	0	199212	Mollusca	2644.0	1
ctg19555	38077	0.43	0	344846	Mollusca	1656.0	0
ctg19556	37108	0.4019	0	329192	Mollusca	831.0	0
ctg6819	97521	0.4166	0	352365	Mollusca	1609.0	0
ctg19550	46950	0.4044	0	348697	Mollusca	1649.0	0
ctg6811	143051	0.4384	0	402525	Mollusca	1578.0	0
ctg19559	76023	0.4156	0	353484	Mollusca	2427.0	0
ctg6815	98519	0.3991	0	352435	Mollusca	2755.0	1
ctg7491	116692	0.4252	0	23136	Mollusca	1816.0	0
ctg7490	113322	0.4058	0	322823	Mollusca	1917.0	0
ctg7492	90115	0.4096	0	334498	Mollusca	1703.0	0
ctg7494	89668	0.4219	0	347549	Mollusca	1974.0	1
ctg7496	91963	0.4217	0	215735	Mollusca	1179.0	1
ctg25874	27740	0.4271	0	25.88	Mollusca	786.0	1
ctg29149	23900	0.4298	0	127374	Mollusca	1655.0	0
ctg25876	28013	0.4107	0	59552	Mollusca	1228.0	0
ctg25877	28562	0.4007	0	210771	Mollusca	962.0	0
ctg25870	27878	0.4258	0	199023	Mollusca	1656.0	0
tig00028589	325567	0.4095	0	256519	Chordata	6734.0	1
ctg25873	27802	0.4088	0	320357	Mollusca	1645.0	0
ctg29142	24716	0.4249	0	323875	Chordata	4663.0	0
ctg25879	79197	0.4104	0	377888	Chordata	1715.0	1
ctg29146	23662	0.4173	0	231655	Mollusca	870.0	0
tig00042763	342720	0.4155	0	339887	Mollusca	3812.0	1
ctg34396	20111	0.4522	0	205158	Mollusca	1051.0	0
ctg27432	26273	0.4058	0	176523	Chordata	2638.0	1
ctg27433	26039	0.4135	0	247307	Mollusca	178.0	0
ctg27431	25917	0.4125	0	357722	Mollusca	5797.0	0
ctg27436	24689	0.4504	0	236844	Mollusca	3211.0	0
ctg34399	19608	0.3983	0	261035	Mollusca	1026.0	2
ctg34398	22838	0.4172	0	187046	no-hit	0.0	0
tig00398242	461626	0.4107	0	30936	Chordata	3416.0	2
tig00005816	518029	0.4179	0	348422	Mollusca	4379.0	1
ctg60025	6451	0.413	0	382642	no-hit	0.0	0
ctg60027	6452	0.4117	0	176417	no-hit	0.0	0
tig00402985	796575	0.4141	0	550187	Mollusca	3759.0	2
ctg49326	12063	0.4179	0	284308	no-hit	0.0	0
ctg57319	7710	0.4304	0	186421	Mollusca	582.0	0
ctg6361	103466	0.4153	0	37979	Mollusca	3476.0	1
ctg6362	113516	0.4459	0	416173	Mollusca	1528.0	0
ctg6366	145295	0.4072	0	385361	Mollusca	2063.0	2
ctg52769	9911	0.4162	0	195464	Mollusca	1083.0	0
ctg55932	8426	0.3871	0	396431	Mollusca	444.0	0
ctg55933	8527	0.4503	0	227538	no-hit	0.0	0
ctg55935	8189	0.4138	0	212038	Mollusca	782.0	0
ctg49057	11785	0.4083	0	217156	Mollusca	928.0	0
ctg26749	22166	0.4049	0	290719	Mollusca	978.0	0
ctg26742	26615	0.4238	0	198293	no-hit	0.0	0
ctg26741	26945	0.4132	0	380796	Mollusca	1168.0	0
ctg26740	26650	0.4135	0	225278	Mollusca	648.0	0
ctg26747	26722	0.4187	0	221331	Mollusca	643.0	0
ctg26745	35513	0.4035	0	285027	Mollusca	1322.0	0
ctg26744	27214	0.3973	0	389771	Mollusca	807.0	0
ctg34649	19516	0.4165	0	17863	Chordata	396.0	0
ctg34645	20058	0.4196	0	190419	Mollusca	682.0	0
ctg34640	20179	0.4109	0	288156	Mollusca	444.0	2
tig00005391	717971	0.4054	0	218092	Chordata	4117.0	1
ctg35519	19636	0.4236	0	200043	Mollusca	154.0	0
ctg35517	17980	0.4212	0	28227	Mollusca	226.0	0
ctg35515	18716	0.4233	0	354087	Mollusca	636.0	0
tig00005398	325894	0.4106	0	308387	Mollusca	3326.0	1
ctg35510	18950	0.4661	0	211603	Mollusca	213.0	0
ctg8682	92648	0.4164	0	419479	Mollusca	1862.0	1
ctg8687	80469	0.4255	0	350503	Mollusca	1249.0	2
ctg8686	82297	0.418	0	331707	Mollusca	2832.0	0
contig_13445	344074	0.4116	0	409049	Mollusca	3355.0	1
ctg53412	9471	0.4065	0	185221	no-hit	0.0	0
tig00080850	201886	0.4152	0	341326	Mollusca	3208.0	1
contig_10814	308717	0.4175	0	334472	Mollusca	3540.0	2
ctg58841	6908	0.3738	0	243173	Mollusca	156.0	0
ctg50693	40929	0.4217	23	27182	Mollusca	2033.0	0
tig02169837	497673	0.4061	0	319549	Mollusca	3216.0	2
ctg38939	16587	0.4281	0	303374	Mollusca	2172.0	0
ctg38938	17913	0.4177	0	30675	Mollusca	1029.0	0
ctg38937	17246	0.4061	0	247609	Mollusca	1040.0	0
ctg50694	10823	0.4083	0	318943	no-hit	0.0	0
ctg38930	38389	0.4029	0	312664	Mollusca	1278.0	0
ctg4437	273602	0.4101	0	297572	Mollusca	3806.0	1
ctg4434	124676	0.409	0	352689	Mollusca	2073.0	1
ctg4433	339441	0.4097	0	240507	Mollusca	3316.0	1
ctg4431	177276	0.411	0	353518	Mollusca	2969.0	1
ctg50698	11265	0.374	0	274465	Mollusca	961.0	0
ctg41321	15425	0.4091	0	281278	Mollusca	450.0	0
ctg37600	33436	0.4286	0	291163	no-hit	0.0	0
ctg41327	15377	0.439	0	261836	Mollusca	512.0	0
ctg41329	15745	0.4721	0	221129	Mollusca	394.0	0
ctg22119	33727	0.4109	0	358133	Chordata	1753.0	0
ctg22111	29041	0.4514	0	474533	Mollusca	634.0	1
contig_7948	250208	0.4211	0	30957	Mollusca	7525.0	1
ctg22117	33124	0.4047	0	320902	Mollusca	1694.0	1
ctg25463	35258	0.4144	0	280294	Mollusca	492.0	0
ctg25462	54649	0.4122	0	183343	Arthropoda	3131.0	0
ctg25467	27973	0.3938	0	283293	Mollusca	209.0	0
ctg25466	27963	0.427	0	221511	Mollusca	436.0	0
tig00402092	237254	0.4112	0	456133	Mollusca	2576.0	2
ctg30554	21229	0.435	0	210474	Mollusca	599.0	0
ctg30557	23160	0.4124	0	28865	Mollusca	950.0	0
ctg30552	23229	0.4143	0	197669	Mollusca	1038.0	0
ctg30558	22274	0.3966	0	252436	Mollusca	672.0	0
ctg38201	16529	0.4211	0	211001	Mollusca	1218.0	0
ctg38202	17408	0.4466	0	201287	Mollusca	1055.0	0
ctg38204	17522	0.4182	0	356477	Mollusca	931.0	0
ctg38207	26743	0.4238	0	259657	Mollusca	289.0	0
ctg38206	17419	0.4078	0	326895	Mollusca	651.0	0
ctg38209	17245	0.4451	0	214492	no-hit	0.0	0
ctg38208	17534	0.4037	0	738688	Arthropoda	662.0	1
tig00399876	246373	0.4295	0	327398	Mollusca	1375.0	0
ctg2870	160379	0.4118	0	357346	Mollusca	3541.0	0
ctg40051	16226	0.3766	0	195042	Mollusca	250.0	0
ctg2874	159447	0.4126	0	179764	Mollusca	2982.0	3
ctg2876	279016	0.4152	0	323399	Mollusca	4020.0	0
ctg25311	26493	0.4126	0	32529	no-hit	0.0	0
ctg40058	16419	0.4095	0	193837	no-hit	0.0	0
tig00009932	1047807	0.4103	0	383365	Mollusca	3887.0	2
ctg25310	27213	0.4303	0	14.85	Mollusca	1512.0	0
ctg25313	28121	0.4081	0	203494	Mollusca	2566.0	0
ctg42563	14970	0.4466	0	242119	no-hit	0.0	0
ctg6921	131884	0.4118	0	322989	Mollusca	2947.0	0
ctg16859	88500	0.4029	0	301463	Mollusca	1486.0	0
ctg40581	16032	0.4403	0	242043	Mollusca	660.0	0
ctg40585	39143	0.3971	0	209369	Mollusca	590.0	0
ctg40587	16400	0.4224	0	255574	Mollusca	1206.0	0
ctg33603	20815	0.4174	0	165266	Mollusca	367.0	0
tig00058991	244112	0.4231	0	344754	Mollusca	3767.0	0
ctg33607	20884	0.4042	0	279497	no-hit	0.0	0
ctg33608	20904	0.4141	0	22969	Mollusca	189.0	0
ctg33609	20256	0.4224	0	342813	Mollusca	486.0	0
ctg9644	230838	0.4072	0	381414	Mollusca	3948.0	1
ctg42697	28278	0.421	0	322541	Mollusca	1269.0	1
ctg42693	14634	0.4053	0	185657	Mollusca	845.0	0
contig_25682	247942	0.4056	0	42.46	Mollusca	3199.0	3
tig00047927	223650	0.4072	0	284813	Mollusca	3529.0	2
ctg31607	22262	0.4184	0	328364	Mollusca	972.0	0
ctg31605	21962	0.4589	0	421058	Mollusca	213.0	0
ctg31602	22218	0.4008	0	304437	Mollusca	355.0	0
ctg31600	20886	0.3871	0	306399	Mollusca	1903.0	0
ctg31608	22953	0.4085	0	290605	Mollusca	2970.0	0
ctg14637	51254	0.4079	0	383078	Mollusca	1553.0	0
ctg14634	100562	0.4102	0	310905	Mollusca	2317.0	1
ctg14632	79164	0.4374	0	221989	Mollusca	1202.0	0
ctg14631	51372	0.4037	0	389961	Mollusca	872.0	0
tig00044729	843393	0.4057	0	407887	Mollusca	8440.0	0
ctg18939	39501	0.4073	0	323864	Mollusca	834.0	0
ctg18938	153168	0.4026	0	940185	Mollusca	1917.0	2
ctg18931	39281	0.4005	0	321625	Mollusca	1724.0	3
ctg18935	39376	0.4304	0	330258	Mollusca	870.0	0
ctg18934	39864	0.4105	0	499474	Mollusca	1799.0	0
ctg18937	54732	0.4129	0	305915	Mollusca	4894.0	0
ctg18936	39884	0.4065	0	263527	Mollusca	1674.0	1
contig_22489	632453	0.4169	0	361703	Arthropoda	3328.0	2
ctg47050	12836	0.3947	0	204012	Mollusca	514.0	0
tig00010587	1336264	0.402	0	395291	Chordata	4663.0	1
tig00019238	291600	0.4029	0	372362	Mollusca	3184.0	1
ctg11370	65875	0.4058	0	346209	Mollusca	1276.0	2
ctg11372	62032	0.4299	0	219136	Mollusca	3116.0	0
ctg11373	63237	0.4127	0	333193	Mollusca	1444.0	0
ctg11374	64985	0.4279	0	395849	Mollusca	1432.0	0
ctg11375	67268	0.4273	0	370758	Mollusca	2748.0	0
ctg11377	65085	0.4059	0	235581	Mollusca	7060.0	0
ctg11378	65359	0.4379	0	345072	Mollusca	7520.0	0
ctg43772	14287	0.4251	0	32222	Mollusca	1683.0	0
ctg43777	14226	0.4045	0	204055	Mollusca	1274.0	0
contig_17110	214359	0.4007	0	317488	Mollusca	3560.0	1
ctg15278	83214	0.4315	0	200993	Arthropoda	2610.0	1
ctg15277	49299	0.4151	0	339024	Mollusca	649.0	0
ctg15271	48649	0.4137	0	368755	Mollusca	1260.0	0
ctg15273	47453	0.4119	0	305995	Mollusca	2048.0	1
ctg15272	65947	0.4166	0	405643	Mollusca	775.0	0
ctg40871	15091	0.4177	0	295687	no-hit	0.0	0
ctg40873	16001	0.4054	0	208572	Mollusca	328.0	0
ctg40875	16177	0.4537	0	736545	Mollusca	1115.0	1
ctg54519	9284	0.4146	0	191196	Mollusca	561.0	0
ctg40876	18202	0.434	0	181226	no-hit	0.0	0
ctg54514	9120	0.4667	0	142427	Mollusca	7875.0	0
ctg54513	8806	0.3442	0	297377	Mollusca	152.0	0
ctg54510	8983	0.4029	0	118098	Mollusca	451.0	0
ctg3914	147163	0.4049	0	300536	Chordata	2094.0	1
ctg49517	11542	0.4244	0	391118	no-hit	0.0	0
ctg49511	11456	0.4564	0	230276	Mollusca	527.0	0
ctg49510	12299	0.4184	0	1228402	Chordata	1126.0	1
ctg3912	228001	0.4053	0	300078	Mollusca	3996.0	0
ctg3913	131691	0.412	0	247605	Mollusca	2453.0	1
ctg3918	204178	0.4173	0	360625	Chordata	5182.0	1
ctg9004	77516	0.3895	0	316751	Mollusca	2369.0	3
ctg52827	8498	0.4016	0	303077	Mollusca	599.0	0
ctg48640	12556	0.4313	0	19292	Chordata	211.0	1
contig_25917	217389	0.4087	23	181588	Mollusca	2208.0	1
tig02171663	620512	0.4042	0	370272	Mollusca	2861.0	1
ctg5424	108551	0.4546	0	432453	Mollusca	491.0	0
ctg5423	114349	0.405	0	336501	Chordata	4550.0	1
ctg12135	62307	0.4231	0	34.81	Mollusca	1400.0	0
ctg12134	86601	0.4298	0	300274	Mollusca	2718.0	2
ctg45348	35207	0.4244	0	688608	no-hit	0.0	0
ctg12130	61450	0.4239	0	224238	Mollusca	2633.0	1
ctg45345	19712	0.3987	0	240787	Mollusca	1520.0	0
ctg45340	13077	0.4385	0	52168	Mollusca	860.0	0
ctg12138	94671	0.4211	0	294339	Arthropoda	3549.0	1
contig_11615	579837	0.4095	0	323534	Mollusca	4292.0	1
ctg13848	53717	0.4161	0	26.3	Mollusca	1137.0	0
ctg13849	54424	0.4166	0	480647	Mollusca	1705.0	0
ctg13847	50103	0.4378	0	403698	no-hit	0.0	0
ctg13840	54771	0.4135	0	185597	Mollusca	1615.0	1
ctg13843	54526	0.4285	0	284503	Mollusca	1120.0	0
tig02173318	583715	0.4038	0	347737	Mollusca	4169.0	2
tig00396335	454809	0.4254	0	403504	Mollusca	3288.0	1
contig_20249	253455	0.4181	0	302159	Mollusca	3012.0	0
tig00395676	431569	0.4037	0	367781	Mollusca	4347.0	0
tig00397735	344122	0.4149	0	630118	Mollusca	12208.0	0
tig00395826	678711	0.413	0	330717	Arthropoda	13877.0	1
ctg19714	37827	0.4176	0	297603	Arthropoda	13823.0	1
ctg19715	75216	0.4052	0	22472	Mollusca	1944.0	1
ctg19713	33265	0.4009	0	229055	Mollusca	996.0	0
ctg19710	69997	0.3837	0	54587	Mollusca	756.0	0
ctg19711	37718	0.4263	0	242329	Mollusca	1287.0	1
ctg19718	37566	0.4371	0	277609	Mollusca	1136.0	0
tig00395829	939538	0.4069	0	360375	Chordata	4286.0	2
ctg16724	44488	0.3932	0	238028	Mollusca	1470.0	0
ctg16722	46470	0.4059	0	252722	Mollusca	1521.0	0
ctg16720	45079	0.4248	0	341188	Mollusca	1022.0	0
ctg16721	47661	0.3879	0	39076	Mollusca	842.0	1
ctg28789	24359	0.4212	0	322269	Mollusca	531.0	0
ctg18814	39631	0.3884	0	319122	Mollusca	1034.0	0
ctg16728	72857	0.4073	0	36619	Mollusca	7934.0	0
ctg16729	58210	0.4266	0	162235	Mollusca	715.0	2
ctg9001	139157	0.4403	0	362103	Mollusca	2411.0	1
ctg45963	12913	0.4284	0	37.69	Chordata	924.0	1
ctg45964	12894	0.4107	0	210364	Mollusca	1166.0	0
ctg45965	13213	0.4053	0	207087	Mollusca	875.0	0
ctg13268	108900	0.4052	0	256878	Mollusca	3149.0	0
ctg13269	137669	0.4021	0	42908	Mollusca	2764.0	2
ctg13262	56647	0.4237	0	21.99	Mollusca	1658.0	0
ctg13263	122465	0.4008	0	176084	Chordata	4757.0	2
ctg13265	90227	0.3986	0	349238	Mollusca	6072.0	0
ctg13267	71893	0.4247	0	192431	Mollusca	2215.0	0
ctg41049	15647	0.4117	0	315704	Mollusca	623.0	0
ctg41048	16536	0.4023	0	246453	Mollusca	1643.0	0
ctg41041	15895	0.4157	0	289248	no-hit	0.0	0
ctg41040	15901	0.4021	0	278472	no-hit	0.0	0
ctg41047	15726	0.4484	0	182983	Mollusca	255.0	0
ctg27639	25253	0.3767	0	257125	Mollusca	840.0	0
ctg53884	9095	0.4031	0	208584	Mollusca	1104.0	1
ctg27635	25592	0.4151	0	171569	no-hit	0.0	0
ctg27637	46717	0.4202	0	287311	Mollusca	798.0	0
ctg53880	8577	0.4013	0	239743	Mollusca	742.0	0
ctg27632	25201	0.406	0	184563	Mollusca	1291.0	0
ctg51033	12027	0.4398	0	334768	Mollusca	1137.0	1
ctg51030	10763	0.4195	0	253536	no-hit	0.0	0
tig02172047	793408	0.4024	0	357778	Mollusca	5076.0	0
contig_21119	661486	0.4058	0	376947	Arthropoda	3215.0	2
ctg20172	37791	0.4111	0	325132	Mollusca	1256.0	2
ctg20173	35789	0.4018	0	222006	Mollusca	1237.0	0
ctg20174	36849	0.3981	0	275541	Mollusca	2036.0	0
ctg20175	37041	0.4419	0	384979	Mollusca	649.0	0
ctg20178	36442	0.4157	0	403188	Mollusca	1349.0	0
ctg27182	26624	0.3884	0	306644	no-hit	0.0	0
tig02170574	313734	0.396	0	390084	Mollusca	3726.0	0
ctg27186	45114	0.4038	0	265331	Mollusca	995.0	0
ctg27187	26354	0.3867	0	291324	Mollusca	1374.0	0
ctg27184	25766	0.3974	0	143442	Chordata	643.0	0
ctg27185	88635	0.3976	0	407667	Mollusca	1595.0	2
ctg27189	26562	0.4181	0	246695	no-hit	0.0	0
contig_19165	313125	0.4113	0	377058	Mollusca	3150.0	2
ctg10768	87037	0.425	0	442008	Chordata	1948.0	1
ctg63939	5215	0.391	0	32554	Mollusca	631.0	0
ctg10765	68829	0.3932	0	215352	Mollusca	1080.0	0
ctg10766	68246	0.3819	0	537746	Mollusca	4067.0	0
ctg10767	87291	0.406	0	31769	Mollusca	2564.0	0
ctg10760	90144	0.4257	0	287184	Mollusca	1478.0	0
ctg10157	98448	0.4302	0	462369	Mollusca	1266.0	1
ctg10762	69472	0.4019	0	334751	Chordata	5838.0	2
ctg26588	26655	0.4187	0	190181	Mollusca	828.0	0
ctg26585	26133	0.4173	0	227913	Mollusca	599.0	0
ctg26584	26428	0.4012	0	209324	no-hit	0.0	0
ctg29555	23744	0.4689	0	250281	Mollusca	932.0	0
ctg29554	24226	0.4042	0	293637	Mollusca	1699.0	0
ctg26581	39653	0.4135	0	235944	Chordata	3364.0	2
ctg26580	27364	0.4263	0	283073	Mollusca	877.0	0
ctg26583	59211	0.4251	0	352481	Mollusca	947.0	0
tig00022883	259614	0.404	0	339545	Mollusca	2928.0	1
ctg10188	141087	0.3947	0	376944	Mollusca	2119.0	0
ctg10189	67899	0.4035	0	206534	Mollusca	2020.0	1
ctg10182	72117	0.409	0	232272	Arthropoda	1414.0	2
ctg10186	72664	0.3902	0	278991	Mollusca	1430.0	1
ctg10187	120505	0.3898	0	367786	Mollusca	1738.0	1
ctg32404	21409	0.4095	0	182295	Mollusca	1490.0	0
ctg32407	12110	0.3809	0	123234	Arthropoda	830.0	0
ctg32406	21820	0.3948	0	36045	Mollusca	745.0	0
ctg32401	59737	0.42	0	456728	Chordata	1989.0	1
ctg32400	21775	0.3932	0	187021	no-hit	0.0	0
ctg32403	21386	0.4088	0	283651	Mollusca	582.0	0
ctg32402	21609	0.3981	0	192933	Mollusca	603.0	0
ctg32409	21368	0.4259	0	37664	Mollusca	711.0	0
tig02170687	843536	0.4181	0	367764	Mollusca	2923.0	3
tig00014506	367327	0.4083	0	331052	Mollusca	3741.0	0
ctg63201	9826	0.4418	0	346914	Mollusca	416.0	1
ctg63209	4893	0.4388	0	250568	no-hit	0.0	0
ctg28200	25374	0.4086	0	253554	Mollusca	1651.0	0
ctg28201	25140	0.4165	0	249463	Mollusca	771.0	0
ctg28203	24906	0.4124	0	224983	no-hit	0.0	0
ctg28204	25345	0.4026	0	235939	Mollusca	862.0	0
ctg28206	25282	0.3999	0	24.2	Mollusca	1200.0	1
ctg28209	46518	0.4373	0	250286	Mollusca	1585.0	0
contig_13130	385754	0.4233	0	731066	Mollusca	3000.0	2
tig00039870	379460	0.4156	0	391541	Mollusca	3215.0	2
ctg12854	58815	0.4244	0	277923	Mollusca	2012.0	2
ctg12855	113478	0.4166	0	398165	Mollusca	1661.0	0
ctg12856	56474	0.4415	0	194675	Mollusca	773.0	0
ctg12857	85161	0.4254	0	291845	Mollusca	2624.0	1
ctg12850	115692	0.3934	0	329739	Mollusca	2176.0	1
ctg12851	127799	0.4087	0	364456	Mollusca	4372.0	1
ctg53263	9669	0.5131	0	91868	no-hit	0.0	0
ctg46363	13373	0.4355	0	373059	Mollusca	165.0	0
ctg46367	12693	0.3988	0	2404456	no-hit	0.0	0
ctg46365	11967	0.4439	0	207388	no-hit	0.0	0
ctg46089	13254	0.4504	0	292326	Mollusca	4402.0	0
ctg46085	13129	0.4268	0	211132	Chordata	958.0	1
ctg46080	13391	0.4208	0	287446	Mollusca	329.0	0
ctg46081	13179	0.4285	0	283377	no-hit	0.0	0
ctg49252	11590	0.4132	0	220296	Mollusca	1198.0	1
ctg49253	11385	0.4488	0	19904	no-hit	0.0	0
ctg4020	210979	0.4083	0	344536	Mollusca	3298.0	2
ctg22463	32734	0.4354	0	464724	Mollusca	222.0	0
ctg22467	32550	0.4116	0	202546	Mollusca	665.0	0
ctg46559	12331	0.4007	0	262925	Mollusca	474.0	0
ctg25113	28518	0.4125	0	318627	Mollusca	500.0	0
ctg25112	28007	0.4181	0	308502	Mollusca	319.0	0
ctg35990	18654	0.4024	0	199328	no-hit	0.0	0
ctg35996	54706	0.4124	0	974072	Mollusca	1913.0	0
ctg25114	28332	0.3995	0	220622	Mollusca	294.0	0
ctg49354	11333	0.3909	0	245379	Mollusca	556.0	0
contig_3424	323248	0.4117	0	326332	Chordata	8383.0	0
ctg50142	11189	0.3978	0	307048	Mollusca	575.0	0
ctg50143	11394	0.439	0	268616	Mollusca	135.0	0
ctg50144	10983	0.4064	0	191694	Mollusca	161.0	0
ctg50145	10221	0.412	0	341659	Mollusca	274.0	0
tig00044630	922835	0.4067	0	324379	Mollusca	7624.0	1
tig02169706	602740	0.4101	0	307483	Mollusca	3880.0	2
ctg54653	8725	0.4567	0	459756	Mollusca	834.0	1
ctg54656	28272	0.4337	0	253772	Mollusca	499.0	1
ctg54657	9021	0.386	0	189018	Mollusca	529.0	0
contig_43393	244857	0.4314	0	29446	Mollusca	3085.0	2
ctg32593	21492	0.429	0	217452	Chordata	890.0	1
ctg23598	40569	0.437	0	256253	Mollusca	1925.0	0
tig00402298	335061	0.4165	0	360889	Mollusca	4256.0	1
ctg36874	17821	0.4033	0	97935	Mollusca	633.0	0
ctg36876	14922	0.4566	0	39067	Mollusca	418.0	0
ctg36877	28856	0.4259	0	198053	Mollusca	709.0	0
ctg36879	18895	0.4062	0	237812	Mollusca	768.0	0
tig00402293	311504	0.4112	0	394835	Mollusca	4657.0	0
tig00011081	519070	0.41	0	271065	Mollusca	3243.0	2
tig00399098	277070	0.4089	0	299878	Arthropoda	2928.0	3
ctg55010	8598	0.4289	0	179974	no-hit	0.0	0
ctg55013	8944	0.4594	0	281975	no-hit	0.0	0
ctg55016	8652	0.388	0	197251	no-hit	0.0	0
ctg21348	33990	0.4071	0	276743	Mollusca	1413.0	0
ctg15680	86335	0.4212	0	218303	Mollusca	1203.0	1
ctg21340	34379	0.4242	0	518053	Mollusca	1506.0	0
ctg15682	59504	0.4072	0	316938	Mollusca	2804.0	0
ctg37831	48187	0.4015	0	477491	Mollusca	812.0	0
ctg20432	36358	0.3946	0	337333	Mollusca	1703.0	0
ctg15683	79100	0.4109	0	259677	Chordata	3159.0	2
ctg20437	72760	0.3958	0	344286	Mollusca	607.0	0
ctg20436	36045	0.3867	0	255558	Mollusca	1400.0	0
ctg37839	18725	0.4244	0	176959	Mollusca	389.0	2
ctg20434	44660	0.4298	0	38.72	Mollusca	1270.0	0
tig00399328	437189	0.4146	0	32935	Mollusca	4122.0	2
scaffold_56103	419285	0.4175	0	272448	Mollusca	3872.0	0
ctg7758	89048	0.4069	0	147005	Mollusca	2265.0	2
ctg7757	169661	0.4174	0	223666	Mollusca	2618.0	1
ctg7754	179731	0.4296	0	390769	Mollusca	2591.0	1
ctg7755	86201	0.4194	0	289049	Mollusca	2368.0	1
ctg7752	83296	0.4155	0	457966	Mollusca	1184.0	0
ctg7750	138288	0.4105	0	396796	Mollusca	3207.0	3
ctg7751	85816	0.4424	0	363201	Mollusca	2017.0	1
ctg27426	25830	0.4287	0	459273	Mollusca	167.0	0
tig00009108	449281	0.4091	0	255394	Mollusca	4431.0	1
contig_5214	322729	0.4113	0	321813	Mollusca	2487.0	2
ctg30829	22130	0.3756	0	46896	no-hit	0.0	0
ctg30828	22817	0.4192	0	23.58	Mollusca	374.0	0
ctg30820	23159	0.414	0	513463	Mollusca	1884.0	2
ctg30822	22189	0.4157	0	176088	Mollusca	558.0	1
ctg30824	22937	0.3737	0	706228	Mollusca	3463.0	1
ctg30826	17064	0.4484	0	274752	no-hit	0.0	0
ctg30827	22819	0.3937	0	329543	Mollusca	634.0	0
tig00068028	229444	0.4347	0	351534	Mollusca	2547.0	2
ctg34560	20010	0.3929	0	237201	Mollusca	1449.0	2
ctg34567	38591	0.4178	0	31284	Mollusca	583.0	0
ctg2228	195789	0.4127	0	336263	Mollusca	3192.0	1
ctg2225	236078	0.4392	0	271288	Arthropoda	2707.0	1
ctg2222	554324	0.4159	0	361463	Mollusca	6156.0	0
tig00395335	842594	0.412	0	360206	Chordata	5381.0	1
ctg31880	21285	0.4633	0	268919	Mollusca	691.0	0
ctg31882	22318	0.3983	0	287006	Mollusca	248.0	0
ctg31884	22082	0.3941	0	236506	Mollusca	846.0	0
ctg31886	49189	0.4057	0	414678	Mollusca	452.0	0
ctg31887	22086	0.4146	0	199208	no-hit	0.0	0
ctg31888	71450	0.3967	0	323527	Mollusca	1423.0	2
ctg31889	48377	0.4151	0	127977	Arthropoda	1022.0	2
tig00006838	773338	0.4093	0	334894	Chordata	8022.0	0
contig_925	325215	0.4076	0	335988	Mollusca	3771.0	0
contig_927	491346	0.3995	0	244528	Mollusca	3869.0	1
ctg5626	110808	0.4279	0	337331	Mollusca	6190.0	0
ctg5620	125453	0.4081	0	404741	Mollusca	3131.0	1
ctg5622	182377	0.4131	0	352939	Mollusca	2861.0	2
ctg36058	18735	0.4242	0	321484	Mollusca	370.0	0
ctg36056	19141	0.3989	0	358274	Mollusca	4552.0	0
ctg1757	197352	0.4062	0	28632	Mollusca	2825.0	2
ctg6928	97379	0.4068	0	221506	Mollusca	1281.0	0
contig_6976	288563	0.408	0	23251	Cnidaria	7121.0	0
ctg18101	41596	0.4158	0	379272	Mollusca	1408.0	0
ctg57328	7830	0.4212	0	648176	no-hit	0.0	0
ctg9503	128064	0.4108	0	339722	Mollusca	2303.0	0
ctg9502	116796	0.411	0	236772	Mollusca	2068.0	2
ctg9504	78262	0.4233	0	346299	Mollusca	1548.0	2
ctg9507	121914	0.44	0	256184	Chordata	11944.0	0
ctg5996	183610	0.4122	0	312433	Mollusca	3108.0	1
ctg5994	146754	0.4144	0	351266	Mollusca	2645.0	1
ctg5995	108130	0.4224	0	322554	Mollusca	914.0	0
ctg5992	105432	0.4239	0	338133	Mollusca	3306.0	2
ctg5993	158016	0.4064	0	260431	Mollusca	2239.0	2
ctg5990	154116	0.4204	0	328076	Chordata	2507.0	2
ctg18104	69095	0.3997	0	181662	Mollusca	1761.0	1
ctg18106	41895	0.4176	0	341867	Mollusca	2310.0	0
ctg18107	167412	0.4004	0	374161	Mollusca	2842.0	1
ctg42880	12517	0.4487	0	182347	no-hit	0.0	0
ctg42886	15070	0.4003	0	262628	Mollusca	676.0	0
ctg42885	24707	0.4094	0	1541616	Mollusca	605.0	0
ctg23479	30752	0.4325	0	29577	Mollusca	407.0	0
ctg23471	25962	0.4221	0	398996	Mollusca	1141.0	0
ctg23475	30947	0.4248	0	216211	Mollusca	1373.0	0
ctg22708	31651	0.4	0	313977	Mollusca	801.0	0
ctg22702	82727	0.4002	0	222698	Mollusca	2253.0	1
ctg22701	30007	0.4036	0	371342	Mollusca	644.0	1
ctg22700	94067	0.4124	0	254265	Mollusca	2440.0	1
ctg22705	29128	0.4282	0	469131	Mollusca	1389.0	0
ctg22704	32459	0.4444	0	340265	Chordata	956.0	1
contig_30589	301511	0.4151	0	354299	Mollusca	4944.0	0
ctg33108	21172	0.4243	0	34794	Mollusca	393.0	0
ctg33107	20615	0.3989	0	389603	Mollusca	427.0	0
ctg33106	20263	0.4368	0	215221	Mollusca	796.0	0
ctg33103	21051	0.416	0	44451	Mollusca	606.0	0
ctg33100	35038	0.4274	0	197039	Chordata	2808.0	1
ctg3667	143064	0.4112	0	365599	Mollusca	1849.0	1
ctg41286	14955	0.4468	0	29549	no-hit	0.0	0
ctg8688	146708	0.41	0	337482	Mollusca	2821.0	1
tig00007057	1324150	0.4099	0	354694	Mollusca	2515.0	4
ctg8362	96498	0.4	0	701686	Mollusca	1784.0	2
ctg8360	83517	0.4127	0	414318	Chordata	3035.0	1
ctg3593	142799	0.4124	0	381761	Mollusca	2984.0	1
ctg8366	87570	0.4084	0	339207	Mollusca	2693.0	1
ctg3596	175065	0.4075	0	354388	Mollusca	2799.0	1
ctg8365	95174	0.4135	0	356208	Mollusca	2612.0	1
ctg8369	141811	0.408	0	338035	Mollusca	2194.0	0
ctg40625	15844	0.3932	0	197022	no-hit	0.0	0
ctg40626	16201	0.4028	0	178537	Mollusca	316.0	0
ctg40627	16565	0.4143	0	382282	no-hit	0.0	0
ctg47939	11895	0.4369	0	236913	Platyhelminthes	1205.0	2
ctg47930	11940	0.4248	0	339949	Mollusca	862.0	0
ctg47933	12330	0.4232	0	291546	Chordata	1126.0	1
ctg47932	12144	0.3902	0	178758	Mollusca	592.0	0
ctg30450	22568	0.4116	0	36703	Mollusca	464.0	0
ctg30453	20543	0.3928	0	136021	Mollusca	2990.0	0
contig_36862	237604	0.4103	0	350646	Mollusca	2332.0	2
ctg30456	23401	0.4195	0	232267	Chordata	2873.0	1
ctg30458	23341	0.4199	0	189007	Mollusca	614.0	0
ctg30459	23163	0.3908	0	575297	Arthropoda	5128.0	1
ctg33811	20425	0.4259	0	468041	Mollusca	612.0	0
ctg33810	20705	0.4164	0	190146	Arthropoda	990.0	1
ctg33812	20417	0.4451	0	953284	no-hit	0.0	0
tig00020384	823859	0.4128	0	371722	Chordata	3325.0	2
tig00397810	320002	0.4085	0	372516	Chordata	4047.0	2
tig00016286	373831	0.4052	0	338964	Mollusca	8460.0	0
tig00088334	211050	0.4138	0	391944	Mollusca	2453.0	2
ctg42718	14926	0.4269	0	223892	Mollusca	514.0	0
ctg42719	14141	0.4394	0	382996	Mollusca	285.0	0
ctg42712	14405	0.4358	0	346643	Mollusca	402.0	0
ctg42717	13583	0.408	0	225764	Mollusca	661.0	0
ctg42714	14972	0.4281	0	187925	no-hit	0.0	0
ctg42715	14862	0.4215	0	206335	no-hit	0.0	0
ctg8561	84297	0.4033	0	251698	Mollusca	1449.0	0
tig00095047	355461	0.4208	0	357834	Mollusca	3582.0	1
contig_26343	343591	0.409	0	293218	Arthropoda	13782.0	1
tig00077160	830220	0.4093	23	308592	Chordata	4942.0	1
ctg8261	92939	0.4303	0	363622	Mollusca	1743.0	1
tig00054301	253047	0.4156	0	402122	Mollusca	1925.0	3
ctg15846	48130	0.4195	0	339777	Chordata	1126.0	1
ctg15842	69704	0.421	0	285972	Mollusca	1214.0	0
ctg15843	75684	0.4438	0	317616	Mollusca	2485.0	0
ctg15840	87965	0.4137	0	301216	Mollusca	2796.0	2
ctg15841	48210	0.4005	0	481985	Mollusca	3714.0	0
ctg31419	22500	0.4183	0	269475	Mollusca	899.0	0
ctg15849	47835	0.4131	0	380101	Platyhelminthes	2002.0	2
ctg14467	52518	0.3845	0	377372	Mollusca	1796.0	0
ctg14466	52378	0.4139	0	301483	Mollusca	1536.0	0
ctg14465	95993	0.4055	23	14879	Mollusca	3012.0	0
ctg14464	51803	0.4085	0	327577	Mollusca	2436.0	0
ctg14463	51009	0.4167	0	260045	Mollusca	435.0	0
ctg14462	52200	0.3965	0	225351	Mollusca	2489.0	0
ctg14461	51111	0.4128	0	344326	Mollusca	335.0	0
ctg14460	52270	0.3941	0	248448	no-hit	0.0	0
ctg14468	53915	0.402	0	210897	Chordata	1471.0	1
ctg18749	39979	0.3868	0	198664	Mollusca	1008.0	0
ctg15598	48634	0.4029	0	272009	Mollusca	2199.0	1
ctg15599	48496	0.4214	0	279349	Mollusca	1690.0	0
ctg15594	85550	0.4302	0	304954	Mollusca	2809.0	1
ctg15595	47029	0.4238	0	263069	Mollusca	810.0	1
ctg15596	48536	0.4105	0	291872	Mollusca	591.0	0
ctg15591	48096	0.3925	0	34936	Chordata	1534.0	1
ctg18744	60895	0.416	0	323382	Mollusca	6309.0	0
ctg15593	47479	0.4124	0	474176	Mollusca	989.0	0
ctg8446	92595	0.4154	0	313311	Mollusca	1537.0	0
tig00065886	242145	0.4233	0	365447	Mollusca	2300.0	0
ctg46717	13733	0.4391	0	202713	Mollusca	2989.0	0
ctg46714	12897	0.4187	0	19278	no-hit	0.0	0
ctg46712	13117	0.4201	0	16357	Mollusca	158.0	0
ctg46710	12984	0.4005	0	274454	Mollusca	1574.0	2
ctg49727	11302	0.4254	0	113.6	no-hit	0.0	0
ctg49724	11562	0.3937	0	27282	Mollusca	771.0	0
ctg49725	12066	0.4267	0	243174	Mollusca	1355.0	0
ctg49721	28063	0.4338	0	195484	Mollusca	235.0	0
ctg49728	26669	0.4369	0	2347977	Mollusca	5967.0	0
ctg49729	11545	0.4647	0	205174	no-hit	0.0	0
ctg15338	82770	0.405	0	202952	Arthropoda	2154.0	2
ctg15339	124543	0.4124	0	32695	Mollusca	3347.0	0
ctg26777	27216	0.413	0	23.53	Mollusca	780.0	0
ctg15331	64476	0.4287	0	33129	Mollusca	2008.0	0
ctg15332	49882	0.3906	0	20686	Mollusca	840.0	0
ctg44717	13534	0.4297	0	157871	Mollusca	459.0	1
ctg15334	84285	0.4305	0	300422	Mollusca	1294.0	0
ctg44711	13044	0.4187	0	242394	Mollusca	1360.0	0
ctg44713	14022	0.4414	0	24862	Mollusca	914.0	0
ctg11657	64355	0.4209	23	245439	Mollusca	2006.0	2
ctg11655	100436	0.4247	0	134633	Chordata	6629.0	2
ctg11654	64885	0.4194	0	256854	Mollusca	5056.0	0
ctg11653	87621	0.4198	0	322487	Chordata	2681.0	1
ctg11650	63735	0.4341	0	47.68	Mollusca	3186.0	1
ctg11658	69896	0.4199	0	317138	Mollusca	2490.0	1
ctg54490	22081	0.3917	0	1316541	Mollusca	705.0	0
tig00000419	1687699	0.4132	0	544999	Mollusca	14145.0	0
contig_12579	384802	0.4039	0	384922	Arthropoda	3047.0	2
contig_16054	302026	0.4056	0	343897	Mollusca	3472.0	2
ctg13659	55804	0.4141	0	232474	Mollusca	1832.0	1
ctg29379	24545	0.3991	0	264663	Mollusca	413.0	0
ctg29378	32779	0.4205	0	306077	Mollusca	1878.0	1
ctg13655	85256	0.4192	0	415011	Mollusca	4529.0	0
ctg29376	22679	0.4434	0	354605	Mollusca	671.0	0
ctg13657	85231	0.4173	0	286403	Mollusca	1825.0	0
ctg13656	54850	0.4054	0	361978	Mollusca	2033.0	1
ctg13651	51955	0.4183	0	325731	Mollusca	2197.0	1
ctg13650	54706	0.4213	0	282778	Mollusca	1846.0	0
ctg13653	113113	0.4163	0	29698	Mollusca	3867.0	1
ctg13652	55281	0.4124	0	285274	Mollusca	847.0	0
ctg16025	47121	0.4218	0	419773	Mollusca	1390.0	0
ctg16024	47084	0.3883	0	138128	Mollusca	540.0	0
ctg16027	45706	0.4127	0	29588	Mollusca	1993.0	2
ctg16026	46298	0.4267	0	177945	Mollusca	918.0	0
ctg16020	47234	0.3875	0	353594	Arthropoda	3126.0	2
ctg16022	77431	0.4432	0	908369	no-hit	0.0	0
ctg16029	70909	0.4016	0	582704	Mollusca	4015.0	0
ctg16028	47729	0.4094	0	296619	Arthropoda	17433.0	1
ctg7806	111471	0.4034	0	407189	Mollusca	3956.0	0
ctg59171	6701	0.4328	0	359707	no-hit	0.0	0
tig00396782	466913	0.4117	0	371145	Mollusca	2716.0	3
ctg59175	6751	0.4348	0	397816	no-hit	0.0	0
ctg19907	37260	0.4286	0	619918	Mollusca	3049.0	0
ctg19906	37411	0.3989	0	14803	Mollusca	1890.0	0
ctg19905	34069	0.4243	0	30082	Mollusca	1193.0	0
ctg19904	36977	0.416	0	359088	Mollusca	1121.0	0
ctg19902	37382	0.3918	0	299633	Mollusca	759.0	0
ctg19901	72176	0.4102	0	335301	Mollusca	976.0	0
ctg19900	35443	0.4296	0	210236	Chordata	3430.0	1
ctg19908	55034	0.4329	0	469236	Mollusca	1412.0	0
ctg8440	140526	0.4392	0	366993	Mollusca	737.0	1
ctg51648	10058	0.4136	0	238762	Mollusca	552.0	0
ctg12309	100057	0.4214	0	37432	Mollusca	2884.0	0
ctg12300	61227	0.4137	0	210547	Mollusca	1358.0	0
ctg12301	59936	0.417	0	185987	Mollusca	1747.0	0
ctg12303	84027	0.4369	0	346905	Mollusca	1792.0	1
ctg12304	99606	0.4447	0	377942	Mollusca	1735.0	0
ctg12305	73030	0.4332	0	355136	Mollusca	302.0	0
ctg12306	61521	0.397	23	19186	Mollusca	2427.0	0
ctg12307	104603	0.4244	0	323644	Mollusca	1646.0	0
ctg21108	34923	0.4122	23	236572	Mollusca	2156.0	0
ctg21107	32994	0.4037	0	149944	Mollusca	2357.0	0
ctg21102	35660	0.3971	0	309096	Mollusca	1455.0	0
ctg24558	28663	0.4212	0	225342	Mollusca	948.0	0
ctg24559	29096	0.417	0	249858	Mollusca	1182.0	0
ctg24555	29374	0.3955	0	408572	Mollusca	350.0	0
ctg24556	29351	0.4298	0	330926	Mollusca	638.0	0
ctg24557	29427	0.3964	0	210794	Mollusca	1227.0	0
ctg24551	30354	0.3992	0	281462	Mollusca	2393.0	2
ctg24552	26781	0.4269	0	440464	Mollusca	1030.0	0
ctg24553	29134	0.4112	0	342379	Mollusca	1450.0	0
ctg28420	25045	0.4138	0	237517	Mollusca	1027.0	0
ctg16680	86481	0.4239	0	339763	Mollusca	2627.0	1
ctg16683	46180	0.396	0	386087	Mollusca	1062.0	0
ctg28425	26067	0.4435	0	278892	Mollusca	1947.0	0
ctg16687	60298	0.4193	0	263488	Mollusca	1971.0	1
ctg28428	25575	0.42	0	289086	Mollusca	468.0	0
ctg28429	25414	0.4342	0	529318	Mollusca	675.0	1
ctg50554	11252	0.4445	0	225988	no-hit	0.0	0
ctg15896	80548	0.3967	0	25.1	Mollusca	6670.0	1
ctg51766	8495	0.3567	0	347497	no-hit	0.0	0
ctg17376	42009	0.4072	0	220587	Mollusca	1865.0	0
ctg17374	72477	0.4315	0	358564	Chordata	3047.0	1
ctg17373	59204	0.4197	0	307662	Mollusca	2060.0	0
ctg17370	43083	0.413	0	18853	Arthropoda	942.0	2
ctg17379	44181	0.4082	0	326502	Mollusca	1405.0	1
ctg10685	90831	0.4205	0	492919	Mollusca	2638.0	1
ctg10684	83310	0.4136	0	273058	Mollusca	2630.0	1
ctg10683	69513	0.4209	0	256641	Arthropoda	3446.0	2
ctg10681	102507	0.4	0	750982	Mollusca	1935.0	1
contig_10063	370627	0.4078	0	255096	Mollusca	3622.0	1
ctg16976	71121	0.3959	0	235839	Mollusca	2056.0	1
ctg16975	63407	0.426	0	422667	Mollusca	1060.0	0
ctg16972	44169	0.3854	0	372168	Mollusca	489.0	0
ctg53925	9269	0.3977	0	225536	Mollusca	490.0	0
ctg17088	43854	0.4349	0	303999	Mollusca	1221.0	0
ctg53922	9024	0.4179	0	175765	no-hit	0.0	0
ctg53921	8930	0.4467	0	249094	no-hit	0.0	0
ctg17086	44349	0.4264	0	245081	Mollusca	1478.0	0
ctg17087	91127	0.3981	0	318979	Arthropoda	13467.0	1
ctg17080	44052	0.4042	0	290574	Mollusca	1278.0	0
ctg17082	44020	0.3978	0	224537	Mollusca	1194.0	0
ctg17083	60269	0.4169	0	332542	Mollusca	2421.0	1
ctg60316	6174	0.4407	0	309678	no-hit	0.0	0
contig_51970	363001	0.4187	0	305432	Mollusca	2767.0	1
ctg33277	20414	0.3878	0	214285	Mollusca	719.0	0
ctg33276	20246	0.4053	0	332547	Mollusca	834.0	0
ctg51202	10184	0.4244	0	162903	no-hit	0.0	0
ctg56256	8028	0.3925	0	231303	Mollusca	1179.0	0
ctg56257	8187	0.4208	0	449623	Mollusca	195.0	0
ctg51209	10937	0.3981	0	256576	no-hit	0.0	0
ctg26950	26722	0.4143	0	29817	Mollusca	876.0	0
ctg26951	26674	0.4156	0	267748	Mollusca	1073.0	0
ctg26956	26217	0.4202	0	346421	Mollusca	1301.0	0
ctg26954	27917	0.4274	0	175614	Arthropoda	1153.0	2
ctg26955	26521	0.4292	0	232994	Mollusca	490.0	0
ctg26958	71557	0.4043	0	367416	Mollusca	2432.0	1
ctg14418	67641	0.419	0	258773	Mollusca	6210.0	0
tig00400413	431375	0.4205	0	302205	Chordata	9641.0	0
ctg27392	24911	0.4602	0	229955	Mollusca	984.0	0
ctg27391	26897	0.4083	0	248601	Mollusca	660.0	0
ctg27397	26290	0.4253	0	601555	Chordata	1970.0	2
ctg27396	25899	0.4261	0	219402	Mollusca	204.0	0
tig00403695	556649	0.408	0	398099	Mollusca	4749.0	1
ctg27394	22528	0.4027	0	374947	Mollusca	1170.0	0
ctg27399	24747	0.4009	0	422975	Mollusca	280.0	0
ctg14414	51565	0.4072	0	262492	Mollusca	2243.0	1
ctg60475	6058	0.4383	0	21982	no-hit	0.0	0
tig02171827	206079	0.4024	0	277538	Mollusca	2615.0	2
ctg35761	19355	0.4274	0	303883	Mollusca	995.0	0
ctg35760	19192	0.4288	0	328249	Mollusca	919.0	0
ctg14412	53170	0.418	0	28633	Mollusca	2426.0	0
ctg35769	19289	0.3864	0	187752	no-hit	0.0	0
ctg14413	92672	0.412	0	353077	Mollusca	3254.0	0
ctg10539	72380	0.4121	0	325783	Mollusca	990.0	0
ctg14858	96919	0.4142	23	207071	Mollusca	1474.0	1
ctg10535	70489	0.4176	0	212834	Mollusca	2454.0	0
ctg14857	50037	0.3924	0	244757	Mollusca	2328.0	1
ctg14854	69916	0.4143	0	257311	Chordata	6316.0	1
ctg14855	26039	0.4075	0	143939	Mollusca	633.0	0
ctg10531	71026	0.3965	0	295962	Chordata	5272.0	1
ctg10530	68894	0.419	0	310607	Chordata	2791.0	1
ctg10533	71114	0.415	0	236427	Arthropoda	2445.0	1
contig_16087	430809	0.4088	0	28132	Chordata	4447.0	1
contig_12966	232434	0.4167	0	318897	Mollusca	3501.0	1
scaffold_28065	249169	0.4264	100	486647	Chordata	2146.0	2
tig00070299	266413	0.4126	23	270217	Mollusca	2677.0	1
contig_16084	206530	0.4087	0	25434	Mollusca	2144.0	1
tig00022921	1617563	0.4049	0	39002	Mollusca	4530.0	2
contig_2059	229100	0.4034	0	272192	Mollusca	3455.0	1
ctg28446	25434	0.4126	0	241197	Mollusca	448.0	0
tig00027250	373620	0.4139	23	354601	Mollusca	2921.0	1
ctg28444	25079	0.3895	0	218032	Mollusca	1507.0	0
ctg26042	27842	0.4396	0	27041	Mollusca	592.0	0
ctg30667	22892	0.3904	0	26642	Chordata	3224.0	1
ctg32234	21014	0.4017	0	311401	Mollusca	786.0	0
ctg23678	44018	0.3945	0	260174	Chordata	307.0	1
ctg23679	41656	0.3994	0	264211	Mollusca	1055.0	0
ctg32230	21442	0.402	0	218306	Mollusca	1385.0	0
ctg32231	22053	0.4179	0	137907	Mollusca	1026.0	0
ctg62291	6154	0.3806	0	213731	Mollusca	294.0	0
ctg23676	29523	0.3866	0	188589	Mollusca	298.0	0
ctg23670	30616	0.3885	0	903742	Chordata	2938.0	1
ctg23671	31040	0.3849	0	134457	Mollusca	1152.0	0
ctg23672	29115	0.4192	0	182391	Mollusca	3053.0	0
ctg32239	20596	0.4075	0	252414	Mollusca	497.0	0
ctg111	550433	0.3999	0	367168	Mollusca	3427.0	0
ctg117	620042	0.4193	0	387926	Mollusca	3673.0	2
ctg118	526548	0.4098	0	356874	Mollusca	3946.0	0
ctg34965	40690	0.4095	0	362229	Mollusca	698.0	0
ctg34962	19525	0.4037	0	354962	no-hit	0.0	0
ctg53178	9750	0.4213	0	848941	Mollusca	169.0	0
ctg9641	75698	0.4135	0	226277	Mollusca	1925.0	0
ctg7414	231630	0.4143	0	395193	Mollusca	2857.0	0
ctg25632	57197	0.4223	0	492333	Mollusca	2863.0	0
ctg25634	27133	0.3834	0	240187	Chordata	1283.0	3
ctg25635	24827	0.4224	0	390808	no-hit	0.0	0
ctg25638	27342	0.4165	0	404544	Mollusca	1035.0	1
scaffold_28938	335123	0.421	100	373064	Mollusca	3287.0	2
ctg36447	18482	0.411	0	332648	Arthropoda	786.0	1
ctg36441	18216	0.4106	0	21915	Mollusca	350.0	0
contig_2949	263595	0.4096	0	320463	Mollusca	3131.0	0
ctg8161	116163	0.4061	23	293083	Mollusca	2226.0	0
ctg8162	177145	0.4244	0	191958	Mollusca	3224.0	0
ctg8164	86053	0.4259	0	477425	Mollusca	1789.0	1
ctg8165	150525	0.3883	0	54706	Mollusca	1736.0	3
ctg8168	85579	0.4254	0	372761	Mollusca	2169.0	0
ctg8169	135957	0.4023	0	359561	Mollusca	2757.0	2
ctg58340	7159	0.4618	0	181441	Mollusca	308.0	0
ctg58346	7082	0.4325	0	17627	no-hit	0.0	0
contig_7536	712648	0.4042	0	305644	Mollusca	4736.0	0
ctg39329	16818	0.42	0	211799	Mollusca	483.0	0
ctg39323	17110	0.4397	0	19827	Mollusca	1122.0	1
ctg59434	6924	0.4689	0	357362	no-hit	0.0	0
ctg25098	28135	0.4055	0	184037	Mollusca	457.0	0
ctg25094	72850	0.4017	0	207468	Mollusca	3051.0	1
ctg25095	26301	0.4253	0	44.59	Mollusca	728.0	0
ctg25091	28503	0.3801	0	329235	Mollusca	167.0	0
ctg24943	28644	0.4127	0	379299	Mollusca	862.0	0
ctg24947	28663	0.4074	0	30.71	Mollusca	2198.0	0
ctg24946	26947	0.4573	0	34935	Mollusca	882.0	0
ctg24945	28881	0.4351	0	254088	Mollusca	512.0	0
ctg24949	58651	0.4133	0	252444	Mollusca	716.0	0
ctg24948	23724	0.4037	0	387528	Mollusca	152.0	0
ctg7389	91948	0.4199	0	356618	Platyhelminthes	1622.0	2
ctg7383	152353	0.404	0	268314	Chordata	2061.0	1
ctg7382	93957	0.4298	0	266171	Mollusca	1585.0	0
ctg51784	10191	0.4067	0	252436	Mollusca	421.0	0
ctg37316	18189	0.417	0	208759	Mollusca	2009.0	0
ctg37311	50828	0.4059	0	394544	Platyhelminthes	854.0	4
ctg37318	27992	0.4128	0	198797	Mollusca	250.0	0
ctg61791	5920	0.4084	0	23173	no-hit	0.0	0
ctg61795	5948	0.3951	0	489045	Mollusca	641.0	0
tig00399423	661880	0.4142	0	36162	Mollusca	3836.0	2
tig00034796	253683	0.4171	0	378041	Mollusca	7433.0	0
ctg1970	476706	0.4076	0	34401	Chordata	5735.0	2
ctg1972	175749	0.398	0	385298	Mollusca	2586.0	1
ctg8838	77106	0.3965	0	307938	Mollusca	705.0	0
ctg8839	109168	0.3946	0	318615	Mollusca	2955.0	1
ctg8834	103442	0.4429	0	327363	Mollusca	3021.0	0
ctg8833	151870	0.4249	0	366072	Mollusca	2426.0	1
ctg8830	117102	0.4023	0	337535	Mollusca	2292.0	2
ctg55194	8341	0.4158	0	334648	Mollusca	672.0	0
ctg55193	8225	0.4444	0	252355	Chordata	332.0	0
tig00023220	369273	0.4293	0	262087	Mollusca	8445.0	0
tig00033859	459403	0.4088	0	273102	Chordata	11097.0	0
ctg6470	101567	0.4039	0	188333	Mollusca	1590.0	0
ctg6473	308621	0.4129	0	241114	Mollusca	10565.0	1
ctg6477	102380	0.4062	0	211791	Mollusca	1578.0	0
ctg31259	22232	0.4314	0	264558	Mollusca	1568.0	3
ctg55228	8451	0.4175	0	1518005	no-hit	0.0	0
ctg31251	41059	0.4392	0	178545	Mollusca	1716.0	3
ctg55223	8799	0.3987	0	198353	no-hit	0.0	0
ctg31253	22462	0.3993	0	356176	Mollusca	596.0	0
ctg31252	22498	0.4457	0	319827	Mollusca	920.0	0
ctg883	647412	0.4117	0	343989	Mollusca	4243.0	1
tig02169345	389664	0.4146	0	350859	Arthropoda	3128.0	2
ctg18505	39802	0.3939	0	289228	Mollusca	1573.0	0
ctg18500	40270	0.4068	0	267024	Mollusca	1025.0	0
ctg18501	37833	0.4639	0	132064	no-hit	0.0	0
tig00396857	578905	0.4249	0	1177583	Mollusca	45073.0	0
ctg2381	172810	0.41	0	36.15	Arthropoda	5087.0	2
ctg2384	234273	0.4082	0	371198	Mollusca	3767.0	0
ctg54330	9456	0.4598	0	313598	Mollusca	904.0	0
ctg56751	7992	0.4394	0	301787	Mollusca	567.0	0
ctg56754	7797	0.4266	0	41868	no-hit	0.0	0
contig_2558	258730	0.4236	0	254978	Mollusca	3738.0	1
tig00028788	297535	0.4082	0	276821	Mollusca	7263.0	0
[truncated: 26,538 more rows]

## Sheet: blastn.blobDB.json.bestsum.phyl
contig name	colour	count_visible	count_visible_perc	span_visible	span_visible_perc	n50	gc_mean	gc_std	cov0_mean	cov0_std	cov0_read_map	cov0_read_map_p
all	None	28.537	100.0%	3,490,924,950	100.0%	333.11	0.41	0.018	31.3	53.7	793,466,653	97.5%
Mollusca	#1f77b4	21.367	100.0%	2,676,896,205	100.0%	310.893	0.41	0.016	31.5	60.7	607,968,024	74.7%
Chordata	#ff7f0e	2.559	100.0%	441,215,200	100.0%	451.676	0.42	0.015	30.9	17.3	100,343,542	12.3%
Arthropoda	#d62728	1.286	100.0%	308,884,422	100.0%	503.792	0.41	0.013	32.2	13.5	71,523,709	8.8%
no-hit	#d3d3d3	3.039	100.0%	48,512,619	100.0%	19.247	0.42	0.03	29.9	27.9	10,084,754	1.2%
Platyhelminthes	#9467bd	206	100.0%	7,873,874	100.0%	47.835	0.42	0.02	33.3	19.6	1,905,096	0.2%
Cnidaria	#e377c2	46	100.0%	4,692,199	100.0%	288.563	0.41	0.014	30.1	7.8	1,035,592	0.1%
Annelida	#7f7f7f	8	100.0%	1,537,677	100.0%	828.08	0.41	0.017	28.3	11.1	351.738	0.0%
Brachiopoda	#bcbd22	1	100.0%	360.73	100.0%	360.73	0.42	0.0	36.1	0.0	87.642	0.0%
other	#ffffff	26	100.0%	957.607	100.0%	45.919	0.42	0.027	24.8	8.6	166.556	0.0%
Nematoda	None	12	100.0%	348.381	100.0%	31.731	0.41	0.017	26.6	6.8	63.743	0.0%
unresolved	None	5	100.0%	226.701	100.0%	118.444	0.42	0.015	25.5	8.7	35.701	0.0%
Gastrotricha	None	2	100.0%	207.391	100.0%	114.707	0.41	0.0028	26.5	8.5	38.204	0.0%
Xenacoelomorpha	None	1	100.0%	48.442	100.0%	48.442	0.41	0.0	21.3	0.0	6.949	0.0%
Rotifera	None	1	100.0%	39.806	100.0%	39.806	0.43	0.0	28.2	0.0	7.54	0.0%
Eukaryota-undef	None	2	100.0%	36.712	100.0%	23.351	0.42	0.0035	24.2	1.9	5.857	0.0%
Ascomycota	None	1	100.0%	34.497	100.0%	34.497	0.43	0.0	32.6	0.0	7.568	0.0%
Streptophyta	None	1	100.0%	10.317	100.0%	10.317	0.46	0.0	14.2	0.0	982	0.0%
